1 **Molecular characterization and culture optimization of marine copepod *Oithona***  
2 ***dissimilis* (Landberg, 1940) from Nagore coastal waters, Southern India**

3 *P. Raju*<sup>1</sup>, *P. Santhanam*<sup>1\*</sup>, *B. Balaji Prasath*<sup>2</sup>, *M. Divya*<sup>3</sup>, *R. Prathiviraj*<sup>4</sup>, *S. Gunabal*<sup>1</sup>,  
4 *P. Perumal*<sup>1</sup>

5 <sup>1</sup>*Department of Marine Science, School of Marine Sciences, Bharathidasan University,*  
6 *Tiruchirappalli-620 024, Tamil Nadu, India.*

7 <sup>2</sup>*Coastal and Marine Ecology Division, Gujarat Institute of Desert Ecology, BHUJ-370001, Gujarat*  
8 *India*

9 <sup>3</sup>*St. Devasahayam Institute of Fisheries Science and technology, Kanyakumari-629193, Tamil Nadu,*  
10 *India*

11 <sup>4</sup>*Department of Microbiology, Pondicherry university, 605014, India.*

12 \* Corresponding author E-mail: [santhanamcopepod@gmail.com](mailto:santhanamcopepod@gmail.com)

13

14

15

16

17 **Corresponding Author:**

18 Dr. P. Santhanam

19 Professor

20 Marine Planktonology & Aquaculture Laboratory,

21 Department of Marine Science, School of Marine Sciences,

22 Bharathidasan University, Tiruchirappalli-620 024,

23 Tamil Nadu, India.

24 E-mail: [santhanamcopepod@gmail.com](mailto:santhanamcopepod@gmail.com)

25 Mobile: 98942 23482

26

27

28

29

30

31

32

### 33 Abstract

34 This study focused on identifying the cyclopoid copepod *Oithona dissimilis* found in the  
35 Nagore coastal waters of Southern India. Based on both morphological and molecular approaches to  
36 identify this species. Morphological characters were confirmed by examining the arrangement of  
37 setae and spines on the exopod of swimming legs 1-4. Molecular studies were performed using the  
38 CO 1 gene, which proved an effective marker for species identification. After identifying the *Oithona*  
39 *dissimilis*, reared them under laboratory conditions to determine the effects of various environmental  
40 parameters on their survival, nauplii production, and population density. Tested different  
41 temperatures, light intensity, pH, salinity, and diets and found that the optimum conditions for rearing  
42 *Oithona dissimilis* under laboratory conditions were a salinity of 25 PSU, a temperature range of 24-  
43 28° C, pH of 8, light intensity of 500 lux, and a mixed algal diet at a concentration of 30,000 cells/ml.  
44 The present study confirms the importance of accurate taxonomic identification for the *Oithona* group  
45 at the species level. Additionally, our findings show that rearing cyclopoid copepods under laboratory  
46 conditions that mimic their natural range of environmental parameters is crucial for the thriving  
47 culture of these organisms, the aquaculture industry frequently utilizes this as a live feed.

48 Keywords: Copepod, *Oithona dissimilis* Morphological, Molecular, Phylogenetic tree

### 49 Graphical abstract

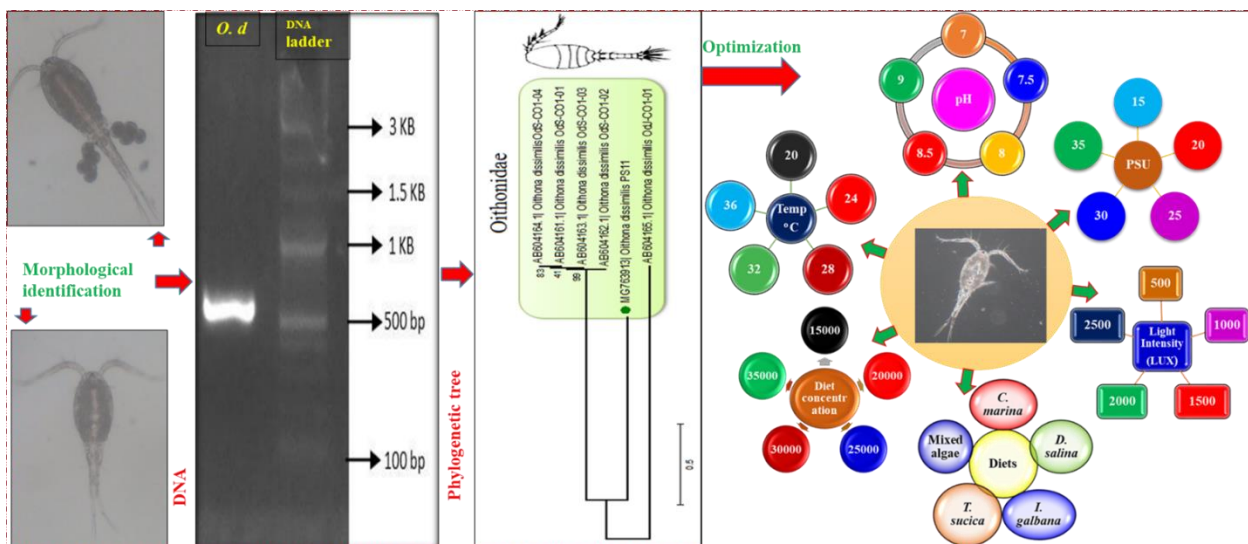

## 51 INTRODUCTION

52 Many predatory fish in pelagic environments rely on tiny copepods as their primary food  
53 source, which are more plentiful than any other live-feed organisms (Spinelli et al., 2011;  
54 Shansudin et al., 1997; Ajiboye et al., 2011). The crustacean genus, *Oithona* is represented by  
55 small-size pelagic copepods that are distributed all over the world's oceans and seas  
56 particularly in tropical and polar seas (Dvoretsky and Dvoretsky, 2015; Paffenhöfer, 1993; Saiz  
57 et al., 2003; Wang et al., 2015 Chew and Chong, 2011; Nielsen and Andersen, 2002; Chew et  
58 al., 2015). In the tropical region, these forms are dominantly distributed in neritic areas (Chew  
59 and Chong, 2011; Rezai et al., 2004). Being microscopic forms, they play an important role in  
60 the regeneration and exporting of nutrients (McKinnon and Ayukai, 1996, Zamora-Terol et al.,  
61 2014a). *Oithona*, which is a type of copepod, has a very important role in the marine food chain  
62 as it acts as a link between different species. The copepod feeds on various things such as  
63 phytoplankton and microbial components. However, the copepods are not safe from predators  
64 as they are being hunted by larger zooplankton and several pelagic ichthyoplankton (Spinelli  
65 et al., 2011; Castro et al., 2010; Van Noord et al., 2013). Despite their richness and important  
66 ecological role in the function of tropical marine diversity, only very little information is  
67 available for the *Oithona* group, especially on their biology and ecology.

68 The copepod, *Oithona dissimilis* Lindberg, 1940 is a copepod that is prevalent in estuaries  
69 located in the South East Asian continent and Islands of the tropical and subtropical West  
70 Pacific. This species is a prominent member of the zooplankton community and can be found  
71 widely distributed across these regions (Ferrari, 1977; Oka and Saisho, 1994; Lo et al., 2004;  
72 Saitoh et al., 2011). It's been found that identifying the species of the genus *Oithona* can be  
73 quite challenging due to their small body size and subtle morphological differences. However,  
74 scientists have recently been using molecular identification techniques to more accurately  
75 identify and classify these copepods. This approach has proven to be quite effective and has  
76 helped us learn more about these fascinating creatures. There is a lack of information regarding

77 cyclopoid copepods, particularly in relation to *Oithona* species. So far, studies have been  
78 concentrated on *O. similis*, *O. atlantica*, *O. nana* (Georgina et al., 2012) and *Dioithona rigida*  
79 (Radhika et al., al 2017). It's important to note that there is currently no available data for the  
80 species *Oithona dissimilis*, which creates some uncertainty in the taxonomic classification of  
81 the *Oithona* group at the species level. One solution to this problem is to use a "total evidence"  
82 approach, which combines both morphological and molecular evidence to identify copepods.  
83 This method has been effective in the past (Mcmanus and Katz, 2009). It's worth noting that  
84 copepods are an important food source for many fish and crustaceans, and using them as a live  
85 feed can boost larval survival and growth rate due to their high HUFA content and a broad  
86 range of body size. It's interesting to note that while live feed such as *Artemia* and *Rotifer* are  
87 widely utilized in aquaculture for larval rearing practices, they may not provide all the essential  
88 nutrients required for optimal growth and development. As a result, there has been much  
89 research focused on mass culturing copepods to provide a more complete and nutritious food  
90 source for larvae. Various research laboratories around the world are currently working on  
91 developing copepod cultures that could potentially be used in the aquaculture industry.  
92 (Santhanam and Perumal 2011). However, due to inconsistency in production due to inefficient  
93 culture procedures, the copepods have not become popularized among aquafarmers. It is quite  
94 challenging to standardize the growth and reproduction of cyclopoid copepods in the field.  
95 However, to determine the ideal requirements for production, growth, and reproductive  
96 parameters, conducting laboratory experiments on the culture of copepods using natural  
97 environmental parameters is the best approach. Such an experiment is crucial for successfully  
98 cultivating copepods that can serve as live feed in the aquaculture industry (Hernandez Molejon  
99 and Alvarez-Lajonchere, 2003; James and Al-Khars, 1986). Temperature, light intensity;  
100 salinity, pH, diets and diet concentration have significant effects on the physiology and  
101 developmental stages of copepods. It is noteworthy that the cultivation of copepods is  
102 contingent upon key factors such as temperature, salinity, and diet. These variables hold

103 considerable sway over the population density of the cultured copepods. It is therefore logical  
104 that the present investigation is focused on the collection, morphological and molecular  
105 characterization of the cyclopoid copepod, *Oithona dissimilis*, and the optimization of culture  
106 parameters for its production. Such efforts have the potential to yield a more comprehensive  
107 and nourishing food source for larvae in the aquaculture domain.

## 108 **MATERIALS AND METHODS**

### 109 **Sample collection and identification**

110 Samples of zooplankton were gathered from the Nagore coastal waters (as seen in Fig. 1)  
111 (Lat. 10.83° 03' N; Long. 79.86° 47' E) using a plankton net made of bolting silk cloth (No.  
112 10, mesh size 158- $\mu$ m) for approximately 20 minutes in the early morning. The samples were  
113 then immediately taken to the laboratory and vigorously aerated with a battery aerator. To  
114 reduce contamination of another zoo and meroplankton, the zooplankton sample was  
115 thoroughly rinsed. To isolate the size fractions that mainly contained adult and later-stage  
116 copepods, the zooplankton sample was screened. Rotifers, nauplii of copepod, and barnacles  
117 were eliminated by rinsing the samples through a zooplankton washer fitted with a 190  $\mu$ m  
118 mesh size. To eliminate fish and prawn larvae, a first-course screening through a 500- $\mu$ m mesh  
119 was performed. Specimens of the target cyclopoid copepod *Oithona* were then isolated and  
120 separated, and their morphological characteristics were observed using standard keys (Davis,  
121 1955; Kasturirangan, 1963; Perumal et al., 1998 and Santhanam and Perumal, 2008). The  
122 isolated copepods were then observed under a stereo-phase contrast microscope and  
123 photographed with a digital still camera. After morphological identification, the separated  
124 copepods were preserved in 5% formalin for further morphological taxonomic study and 95%  
125 ethanol preservation for molecular analysis.

126  
127  
128  
129  
130  
131  
132  
133  
134

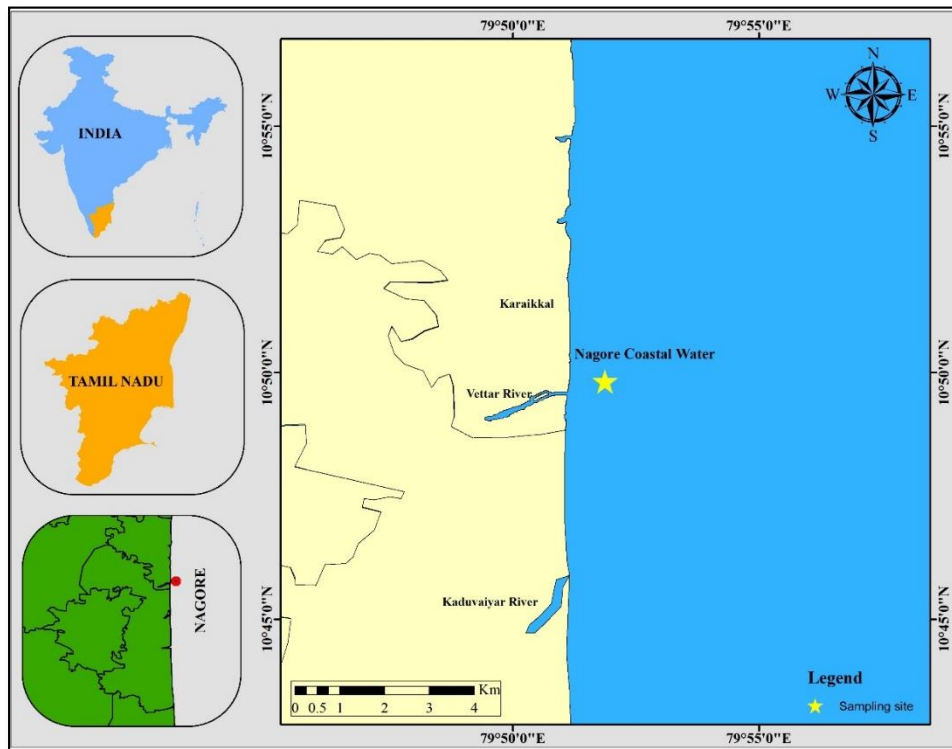

135

**Fig. 1.** Map of the Nagore coastal waters showing the collection site.

136

### **Genomic DNA isolation, PCR analysis and DNA sequencing**

137

The Qiagen DNeasy tissue kit protocol was used to extract genomic DNA from *Oithona*

138

*dissimilis*, a copepod that was identified. To perform the Polymerase Chain Reaction (PCR), 1

139

ml (50ng) of template DNA was mixed with 2ml (10pmol) of each Cytochrome c oxidase

140

subunit I (CO1) primers that target LCO1490: 5'GGTCAACAAATCATAAAGATATTGG3'

141

and HC02198: 5'TAAACTTCAGGGTGACCAAAAAATCA-3' (Folmer et al., 1994). The 20

142

ml mix consisted of 10 ml of PCR Master mix (Amplicon) and 5 ml of double-distilled water.

143

The CO1 amplification process involved an initial denaturation at 94° C for 5 min, 30 cycles

144

at 94° C (60 s), 52° C (60 s), and 72° C (60 s) followed by a final elongation at 72° C for 3 min

145

before being transferred to 48°C until further analysis. An agarose gel electrophoresis (1.5%)

146

was carried out to validate the PCR products. ACME Progen Biotech Pvt. Ltd. (Salem, India)

147

was responsible for DNA sequencing the amplified product, which was edited in the Gene tool

148

and Bio-edit software before being submitted to GenBank.

## 149 **Bioinformatics analysis**

150           The Gene tool and Bio-edit software packages were used initially to edit the sequences.  
151    After editing, the sequences were submitted to the NCBI database. For phylogenetic analysis,  
152    DNA homology searches were carried out using the BLASTN 2.2.24 programs at NCBI, and  
153    similarity sequences were retrieved. To determine the levels of differentiation between genera  
154    and species, a multiple alignment of all similarity sequences was done by Clustal W 2.1. The  
155    phylogeny analysis was performed using the neighbour joining (NJ) search with Kimura 2-  
156    parameter as a model, which was carried out using MEGA version 4.0.2. The tree was  
157    bootstrapped using 1000 sub-replicates. Similarly, MEGA Ver. 4.0.2 was used to calculate the  
158    pair-wise nucleotide distances among the obtained partial 18S rRNA sequence and out-groups,  
159    by using the Kimura 2-parameter (Tamura et al., 2007).

## 160 **Microalgal culture**

161           The cultivation of marine microalgae, namely *Isochrysis galbana* (ISO), *Chlorella*  
162    *marina* (CHL), *Picochlorum maculatum* (PICO), *Nannochloropsis oculata* (NAN) and  
163    *Amphora subtropicalis* (AMS), was carried out with great success. The process was conducted  
164    at the microalgae culture facility located at Bharathidasan University in Tiruchirappalli, India.  
165    The microalgae were grown at a temperature range of 23°-25°, with a salinity level of 30 PSU,  
166    and a light intensity of 45-60 mmol photons/m<sup>2</sup>/sec, for a light/dark cycle of 12 hours each. All  
167    of the microalgal strains were cultured using Walne's (1974) Conway's medium, and the  
168    seawater utilized in the culture underwent filtration with a 1µm filter bag, followed by  
169    sterilization via an autoclave. The containers utilized for the algal culture were meticulously  
170    sterilized before use. The harvested microalgae in the exponential phase were subsequently  
171    utilized as feed for copepods.

172

173



## 174 **Maintenance of copepod stock culture**

175 In order to preserve the original culture, 50 male and female specimens of *O. dissimilis* were  
176 isolated and placed in a 1-liter beaker containing filtered seawater. The copepods were given a  
177 daily diet of mixed microalgae, consisting of equal amounts of ISO, CHL, PICO, NAN, and  
178 AMS, at a concentration of 30,000 cells/ml. The culture medium's salinity and temperature  
179 were adjusted to 26PSU and 28°-30°, respectively. Daily removal of fecal pellets and debris,  
180 and replacement with fresh filtered seawater, ensured optimal conditions. The water quality  
181 parameters were consistently monitored to maintain pH, salinity, and temperature.  
182 *O. dissimilis* has a generation time of 10-12 days under optimal conditions, with 6 nauplii and  
183 6 copepodite stages, including the adult. The adult gravid female copepods were used to restart  
184 mass culture, and the axenic copepod culture was maintained under controlled conditions at  
185 the Marine Planktonology & Aquaculture Laboratory.

## 186 **Experimental setup**

### 187 **Estimation of Survival Rate (SR)**

188 The present study involved the execution of experiments to investigate the survival  
189 rates of copepods in varying water quality and dietary conditions. The study was carried out  
190 over 15 days and involved the use of ten healthy gravid female (*O. dissimilis*) individuals. The  
191 culture was sustained in a 100-milliliter beaker, which contained sterile seawater that was  
192 filtered through a 1-micrometer filter bag. The individuals were enumerated daily, and any  
193 deceased individuals were removed from the beaker. The experiments were conducted in  
194 triplicate and extended over a total period of 15 days. The daily removal of debris and faecal  
195 materials was necessary to maintain the culture.

196

197



## 198 **Determination of Nauplii Production Rate (NPR)**

199           The evaluation of the nauplii production capacity of *O. dissimilis* has been completed  
200 through the systematic assessment of its response to various environmental factors including  
201 temperature, light intensity, pH, salinity, different diets, and diet concentration. A mature  
202 female with viable egg sacs was placed in a test tube filled with 25ml filtered seawater. The  
203 release of nauplii was monitored every one or two hours. Once the nauplii were released, the  
204 adult female was removed from the test tube. The nauplii were subsequently counted under a  
205 microscope. This experiment was conducted in triplicate to ensure accuracy, and the collected  
206 data will undergo statistical analysis to determine the mean  $\pm$  SE values.

## 207 **Assessment of Population density (PD)**

208           The population density of *O. dissimilis* was examined under various conditions,  
209 including water quality, diet, temperature, light intensity, pH, salinity, diet concentration, and  
210 different diets. To begin with, 10 adult copepods were isolated and inoculated into each 500-  
211 ml beaker filled with filtered sterilized seawater. This setup was maintained in triplicate. After  
212 15 days, the animals were harvested through a 48 $\mu$ m mesh and fixed with 5% formalin. Finally,  
213 different stages of copepods (nauplii, copepodites, and adults) were counted under the  
214 microscope to estimate their population densities.

## 215 **Statistical Analysis**

216           The data obtained on the survival rate (SR), nauplii production rate (NPR), and population  
217 density (PDR) of *O. dissimilis*, regarding temperature, light intensity, pH, salinity, different  
218 diets, and diet concentration, have been analyzed using one-way ANOVA. In case of finding  
219 significant differences ( $P < 0.05$ ), Tukey's multiple comparisons test has been applied to  
220 determine the specific difference among treatments. The data are presented as Mean $\pm$ SE.

221

222 **RESULTS**

223 **Morphological description of *O. dissimilis***

224           Female: The metasome has four segments, with each segment having a pair of dorsal  
225 sensory hairs except for segment 2, which has two pairs. The exopod of P1-P4, excluding the  
226 terminal spine, has 1-1-3, 1-1-3, 1-1-3, 1-1-2 external spines, respectively, while the endopod  
227 of P1-P4 has 0-0-1, 0-0-1, 0-0-1, 0-0-1 external setae, respectively, and 1-1-5, 1-2-5, 1-2-5, 1-  
228 2-4 internal setae, respectively. The 5th thoracic segment doesn't have any hairs on the posterior  
229 margin. The caudal rami are longer than the 5th thoracic segment, and the proportions of the  
230 urosomal segments are as follows: 12, 33, 14, 14, 13. P5 has a fine seta that is directed dorsally  
231 and one terminal seta. There is no ciliation on either of these P5 setae, and the terminal seta  
232 reaches almost the end of abdominal segments 1-2. Male: The A1 is twice geniculated, with  
233 the proximal geniculation surrounded by a sheath and the distal geniculation having a notch in  
234 the segment. The caudal rami are shorter than in females, and Si is very short and can only be  
235 seen. The proportions of the autosomal segment's caudal rami are 19: 19: 16: 13: 10: 11: 13.  
236 The prosome is laterally located and has a very complex group of integument organs in an area  
237 comprising the posterior ventral part of cephalosome and posterior extension or flap of  
238 cephalosome overlapping the following segment.

239

240

241

242

243

244

245

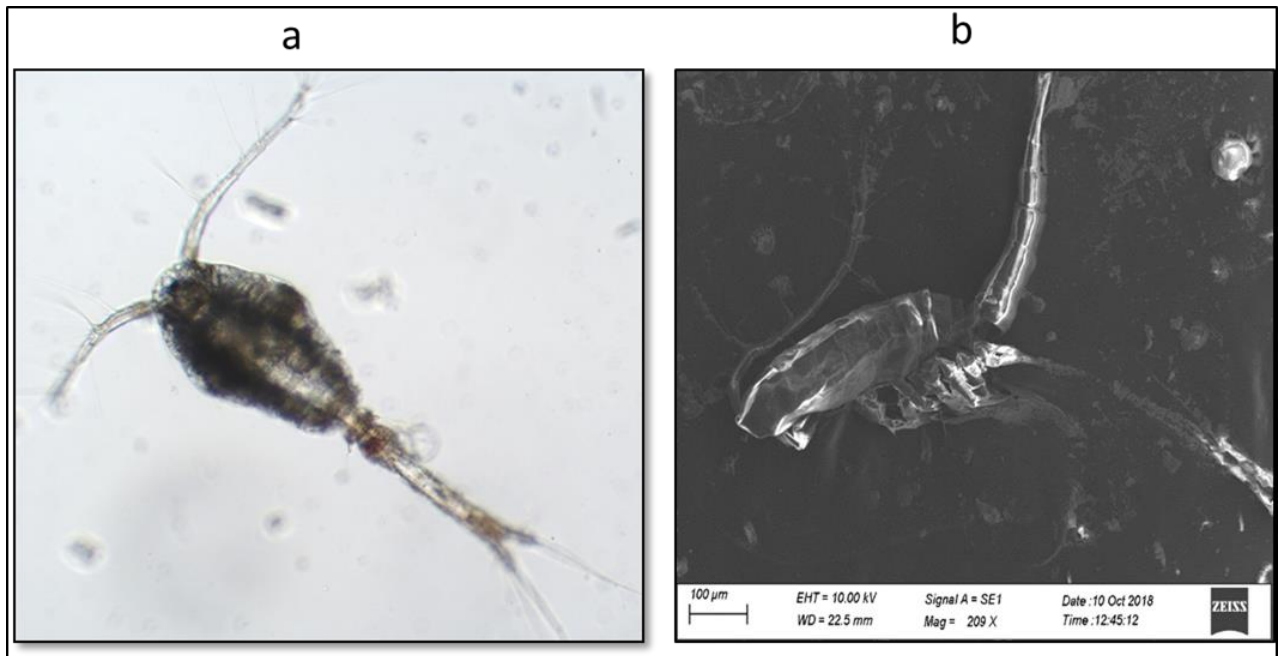

246

247 **Fig. 2.** Stereo phase-contrast microscopic (a) and scanning electron microscopic (b) images of  
248 *O. dissimilis*

249

## 250 **Molecular characterization of CO1 gene of *O. dissimilis***

### 251 **Blast**

252 The dataset was prepared for our target species *O. dissimilis* Contig-PS11 based upon  
253 a similarity search. We selected the species based on the identity (>79%) and above 98% of  
254 query coverage (Table 1).

### 255 **Phylogenetic tree**

#### 256 **Estimation of inter-and intra-specific phylogeny**

257 The Neighbour-Joining analysis method was used to infer the evolutionary history of  
258 the COI gene of *O. dissimilis* PS-11. The optimal tree with a sum of branch length equal to  
259 4.48590762 is presented. The percentage of replicate trees wherein the associated taxa  
260 clustered together in the bootstrap test (1000 replicates) is shown alongside the branches. The  
261 tree is drawn to scale and the branch lengths are in the same units as the evolutionary distances

262 used for inferring the phylogenetic tree. Here we have constructed the phylogenetic tree of both  
263 inter- and intra-specific organisms. The inter-specific phylogeny shows that the COI gene of  
264 *O. dissimilis* PS-11 has diverged from the strains of OdS-CO1-01, OdS-CO1-02, and OdS-  
265 CO1-03; OdS-CO1-04 and thus the present form has been identified as *O. dissimilis* and the  
266 OdJ-CO1-01 act as an ancestor for our target species (Fig 3). The overall mean distance was  
267 found in the range of 1.782 and it surely indicates that *O. dissimilis* PS-11 is involved in the  
268 positive evolution of the Darwinian test for inter-specific phylogeny level. Whereas the intra-  
269 specific phylogeny reveals that, the tree was classified into two major clades and four sister  
270 clades. The first clade consists of four families viz., *Paracalanidae*, *Clausocalanidae*,  
271 *Centropagidae* and *Pontellidae* that are grouped. Whereas the second clade consists of the  
272 Oithonidae family as shown in Fig 5. The overall mean distance was found in the range of  
273 0.150 and it surely indicates that *O. dissimilis* PS-11 is involved in the neutral evolution of the  
274 Darwinian test and no changes have been found to occur during the evolutionary process of  
275 inter-specific phylogeny.

#### 276 **Estimation of pair-wise genetic diversity**

277 The maximum Composite Likelihood method was used to compute evolutionary  
278 distances in terms of the number of base substitutions per site. A total of 6 nucleotide sequences  
279 were analyzed, and any positions with gaps or missing data were eliminated. The genetic  
280 diversity of inter-specific phylogeny shows that *O. dissimilis* OdJ-CO1-01 is highly diverged  
281 when compared to the other strains of *O. dissimilis* and its occurrence range is between 1.031-  
282 1.137 (Table 2). Whereas, the intra-specific pair-wise genetic diversity shows that neutral  
283 evolution will take place and its diversity range was 0.0-0.274 (Table 3). This statistical pair-  
284 wise genetic diversity data shows that our study provided a strong conclusion.

285

286

287 **Table 1:** Dataset preparation of cytochrome c oxidase I of *O. dissimilis* PS-11 and its  
288 phylogenetic similarity using NCBI-BLAST

289

| Accession  | Organism                  | Haplotype  | Query cover |           |              |
|------------|---------------------------|------------|-------------|-----------|--------------|
|            |                           |            | (%)         | E-value   | Identity (%) |
| AB604163.1 | <i>Oithona dissimilis</i> | OdS-CO1-03 | 98          | 3.00E-144 | 81           |
| AB604164.1 | <i>Oithona dissimilis</i> | OdS-CO1-04 | 98          | 9.00E-144 | 81           |
| AB604161.1 | <i>Oithona dissimilis</i> | OdS-CO1-01 | 98          | 4.00E-142 | 81           |
| AB604162.1 | <i>Oithona dissimilis</i> | OdS-CO1-02 | 98          | 5.00E-141 | 81           |
| AB604165.1 | <i>Oithona dissimilis</i> | OdJ-CO1-01 | 98          | 4.00E-117 | 79           |

290

291

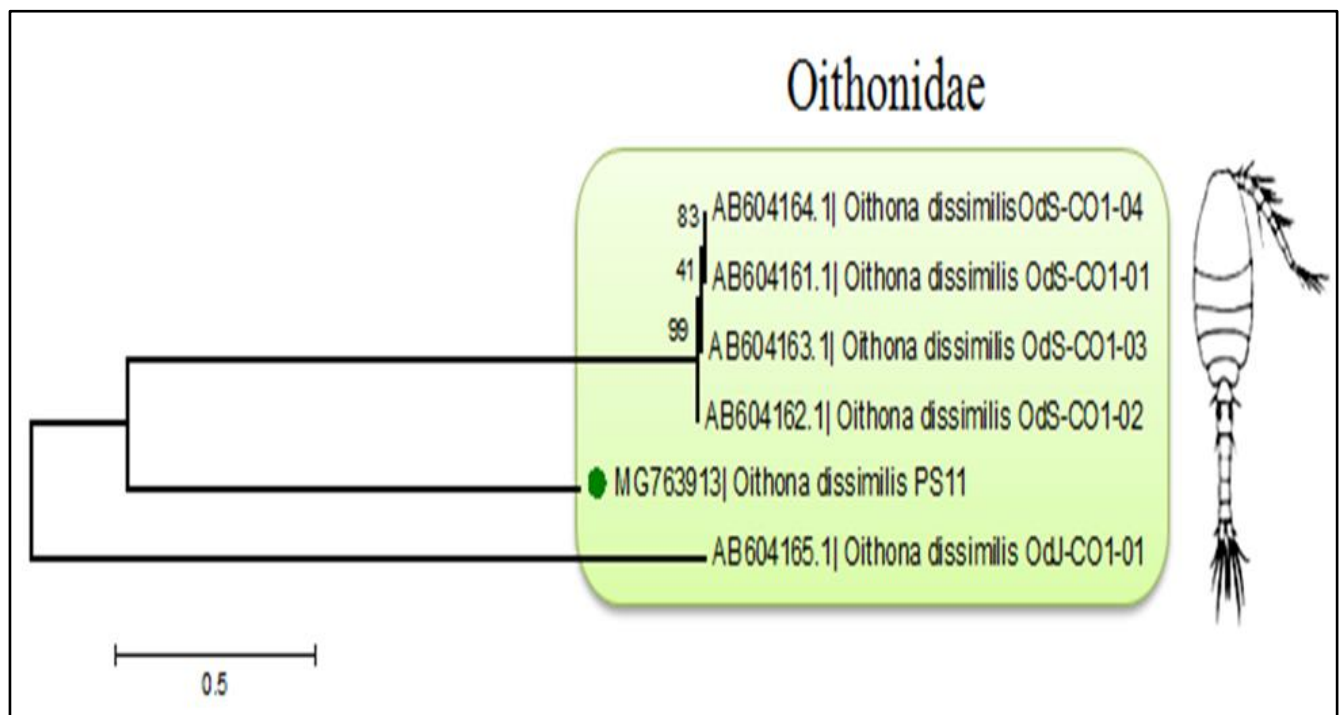

292 **Fig. 3.** Construction of intra-specific phylogenetic tree of COI gene of *O. dissimilis* PS-11  
293 from its closely related sequences obtained from MEGA 7.0. The green colour bullet  
294 differentiates our target sequences.

295

296

297

298

299

300 **Table-2:** Estimation of inter-specific pair-wise genetic distance of COI gene of *O. dissimilis*  
 301 PS-11 from its phylogenetic neighbours obtained from MEGA 7.0.

| S. No. | Accession  | Organism                  | Haplotype  | 1     | 2     | 3     | 4     | 5     |
|--------|------------|---------------------------|------------|-------|-------|-------|-------|-------|
| 1.     | MG763913   | <i>Oithona dissimilis</i> | -          |       |       |       |       |       |
| 2.     | AB604163.1 | <i>Oithona dissimilis</i> | OdS-CO1-03 | 0.854 |       |       |       |       |
| 3.     | AB604164.1 | <i>Oithona dissimilis</i> | OdS-CO1-04 | 0.867 | 0.006 |       |       |       |
| 4.     | AB604161.1 | <i>Oithona dissimilis</i> | OdS-CO1-01 | 0.867 | 0.007 | 0.002 |       |       |
| 5.     | AB604162.1 | <i>Oithona dissimilis</i> | OdS-CO1-02 | 0.87  | 0.008 | 0.006 | 0.007 |       |
| 6.     | AB604165.1 | <i>Oithona dissimilis</i> | OdJ-CO1-01 | 1.031 | 1.137 | 1.131 | 1.131 | 1.116 |

302

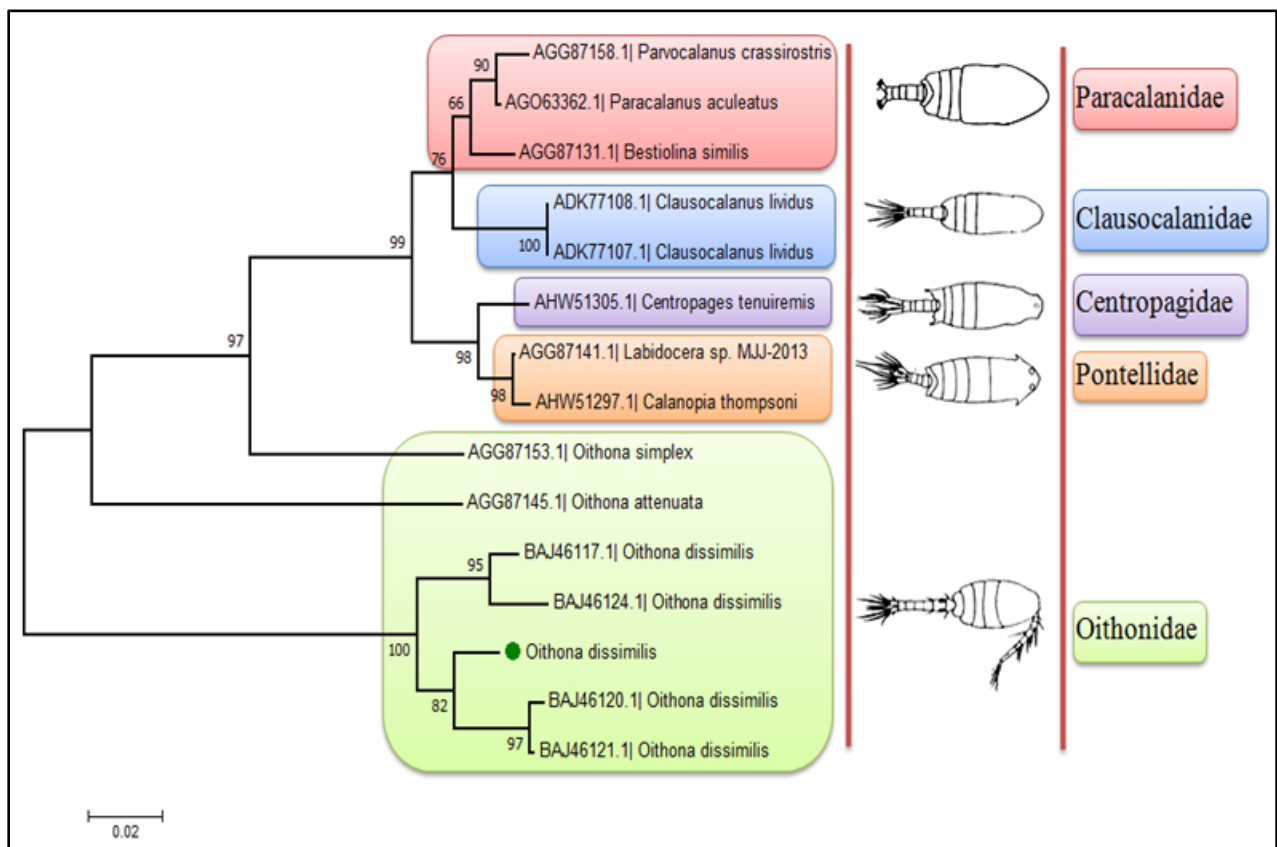

303

304 **Fig. 4.** Construction of inter-specific protein-based phylogenetic tree of COI gene of *O.*  
 305 *dissimilis* PS-11 from its closely related sequences obtained from MEGA 7.0. The green colour  
 306 bullet differentiates our target sequence.

307

308

| S. No. | Organism                          | 1     | 2     | 3     | 4     | 5     | 6     | 7     | 8     | 9     | 10    | 11    | 12    | 13    | 14    | 15    | 16    | 17 |
|--------|-----------------------------------|-------|-------|-------|-------|-------|-------|-------|-------|-------|-------|-------|-------|-------|-------|-------|-------|----|
| 1      | <i>Oithona dissimilis</i>         |       |       |       |       |       |       |       |       |       |       |       |       |       |       |       |       |    |
| 2      | <i>Oithona dissimilis</i>         | 0.032 |       |       |       |       |       |       |       |       |       |       |       |       |       |       |       |    |
| 3      | <i>Oithona dissimilis</i>         | 0.037 | 0.005 |       |       |       |       |       |       |       |       |       |       |       |       |       |       |    |
| 4      | <i>Oithona dissimilis</i>         | 0.046 | 0.051 | 0.056 |       |       |       |       |       |       |       |       |       |       |       |       |       |    |
| 5      | <i>Oithona dissimilis</i>         | 0.065 | 0.065 | 0.07  | 0.023 |       |       |       |       |       |       |       |       |       |       |       |       |    |
| 6      | <i>Parvocalanus crassirostris</i> | 0.251 | 0.268 | 0.262 | 0.262 | 0.274 |       |       |       |       |       |       |       |       |       |       |       |    |
| 7      | <i>Paracalanus acueatus</i>       | 0.251 | 0.268 | 0.262 | 0.262 | 0.274 | 0.009 |       |       |       |       |       |       |       |       |       |       |    |
| 8      | <i>Labidocera sp.</i>             | 0.268 | 0.28  | 0.274 | 0.268 | 0.28  | 0.061 | 0.051 |       |       |       |       |       |       |       |       |       |    |
| 9      | <i>Calanopia Thompson</i>         | 0.274 | 0.286 | 0.28  | 0.274 | 0.274 | 0.065 | 0.056 | 0.005 |       |       |       |       |       |       |       |       |    |
| 10     | <i>Oithona simplex</i>            | 0.274 | 0.28  | 0.28  | 0.268 | 0.251 | 0.125 | 0.125 | 0.125 | 0.125 |       |       |       |       |       |       |       |    |
| 11     | <i>Centropages tenuiremis</i>     | 0.262 | 0.274 | 0.268 | 0.262 | 0.274 | 0.065 | 0.056 | 0.023 | 0.028 | 0.135 |       |       |       |       |       |       |    |
| 12     | <i>Clausocalanus lividus</i>      | 0.251 | 0.268 | 0.262 | 0.268 | 0.28  | 0.046 | 0.037 | 0.061 | 0.065 | 0.146 | 0.061 |       |       |       |       |       |    |
| 13     | <i>Bestiolina similis</i>         | 0.251 | 0.274 | 0.268 | 0.268 | 0.28  | 0.028 | 0.018 | 0.056 | 0.061 | 0.125 | 0.061 | 0.042 |       |       |       |       |    |
| 14     | <i>Labidocera sp.</i>             | 0.268 | 0.28  | 0.274 | 0.268 | 0.28  | 0.061 | 0.051 | 0.0   | 0.005 | 0.125 | 0.023 | 0.061 | 0.056 |       |       |       |    |
| 15     | <i>Bestiolina similis</i>         | 0.251 | 0.274 | 0.268 | 0.268 | 0.28  | 0.28  | 0.018 | 0.056 | 0.061 | 0.125 | 0.061 | 0.042 | 0.0   | 0.056 |       |       |    |
| 16     | <i>Clausocalanus lividus</i>      | 0.251 | 0.268 | 0.262 | 0.268 | 0.28  | 0.046 | 0.037 | 0.061 | 0.065 | 0.146 | 0.061 | 0.0   | 0.042 | 0.061 | 0.042 |       |    |
| 17     | <i>Centropage abdominalis</i>     | 0.268 | 0.268 | 0.262 | 0.268 | 0.28  | 0.065 | 0.056 | 0.018 | 0.023 | 0.125 | 0.042 | 0.046 | 0.065 | 0.018 | 0.065 | 0.046 |    |

309 **Table-3:** Estimation of inter-specific pair-wise genetic distance of COI gene of *O. dissimilis* PS-11 from its phylogenetic neighbours' obtained  
310 from MEGA 7.0  
311



312 **Effect of temperature on Survival rate (SR), Nauplii production rate (NPR) and**  
313 **Population density (PD) of *O. dissimilis***

314 Population density, nauplii production and survival rates were evaluated at various  
315 temperatures. It was noticed that there was a significant difference found in survival rate in the  
316 percentage of copepods. There was above 50 % of survival occurred in almost all the  
317 temperatures tested. The highest survival rate (90%) was found at 28° C on the final day which  
318 was followed by 32° C (70.33%), 24° C (66.6%) and 20° C (56%). whereas, the lowest survival  
319 rate (50%) was observed at 36° C. However, there was a gradual decrease in survival found  
320 from the beginning of the first day towards the final day at a temperature of 36° C  
321 (Fig. 5). In all the test trials performed, the temperature was found to affect the nauplii  
322 production rate. The highest NPR (21.33 nauplii/female) was recovered at 24° C which was  
323 significantly higher ( $P < 0.001$ ) than at 20° C as well as at 36° C except at 24° C and 32° C which  
324 showed a considerably significant difference ( $P < 0.05$ ). The lowest NPR was found at 20° C  
325 and 36° C with only 11.66 nauplii/female which was significantly lower ( $P < 0.001$ ) when  
326 compared to the other temperatures tested (Fig. 5).

327 In all the trials conducted, the total highest population density (279.7 D/L) was obtained  
328 at 28° C which was significantly higher ( $P < 0.001$ ) than the rest of the temperatures tested. The  
329 lowest population density (154 D/L) was obtained at 20° C which was significantly lower  
330 ( $P < 0.001$ ) as compared to the other treatments. Thus, during all the trials, the temperature  
331 significantly affected the population density at different life stages of the copepod (Fig.5).

332 **Effect of salinity on Survival rate (SR), Nauplii production rate (NPR) and Population**  
333 **density (PD) of *O. dissimilis***

334 During the salinity trial, no significant variation was found in the survival rate of  
335 copepods. Above 50 % of survival was found in all the salinity levels tested except at 35 PSU.

336 The highest survival rate (96.66%) was found at 25 PSU on the final day followed by 30 PSU  
337 (73.33%), 20 PSU (70%) and 15 PSU (63.3%). The lowest survival rate (40%) was obtained at  
338 40 PSU salinity level. However, there was a gradual decline in survival from the beginning of  
339 the first day towards the final day at 40 PSU salinity level (Fig. 6). The salinity was found to  
340 affect the nauplii production rate. The highest NPR (22 nauplii/female) was observed at 25  
341 PSU which was significantly higher ( $P<0.001$ ) than at 35 PSU, 20 PSU ( $P<0.05$ ), 15 PSU  
342 ( $P<0.01$ ) and there was no significant difference ( $P>0.05$ ) noticed with 30 PSU salinity level.  
343 The lowest NPR was found at 35 significantly lower PSU ( $P<0.001$ ) than 25 PSU followed by  
344 30 PSU ( $P<0.01$ ) except 15 PSU and 20 PSU which showed no significant difference ( $P>0.05$ )  
345 respectively (Fig.6).

346 The highest total population density (336 ind. l) was obtained at 25 PSU and was  
347 significantly higher ( $P<0.001$ ) than the rest of the salinities tested. The lowest population  
348 density (207.6 D/L) was obtained at 15 PSU which was significantly lower ( $P<0.001$ ) when  
349 compared to the other treatments except at 35 PSU which did not show any significant  
350 difference ( $P>0.05$ ). The same was the condition ( $P>0.05$ ) in the population that occurred  
351 between 20 PSU and 30 PSU salinity levels. Thus, in all the trials the salinity significantly  
352 influenced the population density at different life stages. (Fig.6).

### 353 **Effect of pH on Survival rate (SR), Nauplii production rate (NPR) and Population density** 354 **(PD) of *O. dissimilis***

355 In all pH trials conducted, there was above a 50% survival rate that occurred at all levels  
356 except at pH 7 and pH 9. In two cases of pH 7 and pH 9, there was a gradual decrease in the  
357 percentage of survival from the initial to final stage whereas the higher survival rate was  
358 noticed at pH 8 (86.6%), followed by pH 8.5 (83.3%). The lowest percentage of survival was  
359 found at pH 9 (40%) followed by pH 7 (43.3%) (Fig.7). The pH was found to affect the nauplii  
360 production rate in *O. dissimilis*. The highest NPR (19.66 nauplii/female) was found at pH 8

361 which was significantly greater ( $P < 0.001$ ) than at pH 7 (17.33 nauplii/female) and pH 9 (9.33  
362 nauplii/female) followed by pH 7.5. There was no significant difference ( $P > 0.05$ ) arising for  
363 pH 8 vs pH 8.5 and pH 7.5 vs pH 8.5 respectively. The lowest copepod nauplii production was  
364 recorded at pH 9 (9.33 nauplii/female) which was significantly lower ( $P < 0.001$ ) than with all  
365 other pH levels tested (Fig. 7). In the case of pH, the maximum population density (286.6 ind./l)  
366 was found at pH 8 which was greatly significance. The minimum density (94.6 ind./l) was  
367 observed at pH 7 which was significantly lower ( $P < 0.001$ ) when compared to other pH levels  
368 tested except at pH 9 which showed a considerable significant difference ( $P < 0.05$ ). Thus, in all  
369 the trials, pH significantly affected population density at different life stages. (Fig. 7).

370 **Effect of light intensity on Survival rate (SR), Nauplii production rate (NPR) and**  
371 **Population density (PD) of *O. dissimilis***

372 All the light intensity trials were tested and found that there was above 50% survival in  
373 almost all the intensities except at 2500 Lux where there was a lower survival rate (33.33%).  
374 In high intensity (2500 Lux) there was a gradual decrease in survival rate from the first day to  
375 the final day. The maximum survival (86.67%) was observed at low light intensity (500 Lux)  
376 followed by 1500 Lux (73.33%), 3000 Lux (63.33%) and 4500 Lux (53.33%) (Fig.8). The  
377 production rate of nauplii was affected by differences in light intensity. The maximum  
378 production (22.33 nauplii/female) was found at low light intensity (500 Lux) which was  
379 significantly greater ( $P < 0.001$ ) than 1000 Lux, 1500 Lux, 2500 Lux and 1000 Lux ( $P < 0.01$ )  
380 respectively. The minimum production (8.66 nauplii/female) was found at higher light intensity  
381 (2500 Lux) which was significantly lower ( $P < 0.001$ ) than other intensities except for 2000 Lux  
382 which showed no significant difference ( $P > 0.05$ ). (Fig. 8). During culture at different light  
383 intensities, the total highest population density (276 ind. /l) was obtained at 500 Lux which was  
384 significantly higher ( $P < 0.001$ ) except 1000 Lux which did not show any significant difference  
385 ( $P > 0.05$ ). The lowest population density (180 ind./l) was obtained at 2500 Lux which was

386 significantly lower ( $P < 0.001$ ) as compared to the other intensities tested except at 1000 Lux  
387 ( $P < 0.01$ ) and 2500 Lux ( $P < 0.05$ ). There was no significant difference noticed in population  
388 density under 1500 and 2000 Lux. Thus, in all the trials, light intensity significantly affected  
389 population density at different life stages. (Fig. 8).

390 **Effect of different feed on Survival rate (SR), Nauplii production rate (NPR) and**  
391 **Population density (PD) of *O. dissimilis***

392 In the case of different diet experiments, 50% of survival occurred in almost all algal  
393 feeds used however, the maximum survival rate (93.33%) was observed at *I. galbana* followed  
394 by *C. marina* (83.33%), mixed algae (76.67%) and *D. salina* (56.67%). The minimum survival  
395 rate (60%) was found at *T. suecica*. (9). The type of feed was found to influence the rate of  
396 production of nauplii in almost all the tests performed. The highest production rate (23.66  
397 nauplii/female) was found at mixed algal feed which was significantly higher ( $P < 0.001$ ) than  
398 *T. suecica* followed by *C. marina* ( $P < 0.05$ ), *D. salina* ( $P < 0.01$ ) and for *I. galbana* ( $P > 0.05$ )  
399 which showed no significant difference. The lowest production rate (16.33 nauplii/female) was  
400 noticed in the *T. suecica* diet which was significantly lower ( $P < 0.001$ ) than other feeds tested  
401 except *D. salina* which showed no considerable difference ( $P < 0.05$ ). (Fig. 9). At different algal  
402 feed experiments, the maximum peak (361.33 ind./l) in population density was obtained in  
403 mixed algae which was significantly higher ( $P < 0.001$ ) than the rest of the feeds tested followed  
404 by *C. marina* ( $P < 0.01$ ) and *I. galbana* ( $P < 0.05$ ) respectively. The minimum population (267  
405 ind./l) was obtained in copepod fed with  
406 *D. salina* which was significantly lower ( $P < 0.001$ ) compared to other feeds. There was no  
407 significant difference ( $P > 0.05$ ) found between *D. salina* and *T. suecica*. Thus, in all trials,  
408 different feed types significantly affect the population density of different life stages of the  
409 copepod (Fig. 9).

410 **Effect of feed concentration on Survival rate (SR), Nauplii production rate (NPR) and**  
411 **Population density (PD) of *O. dissimilis***

412 During different concentrations of feed tested presently, there was 50% survival  
413 occurred in almost all the concentrations except 15000 cells/ml. There was a gradual decrease  
414 in survival percentage starting from the beginning and towards the end of the experiment at  
415 low concentrations (15000 cells/ml). The maximum survival of 86.67% was obtained at 30000  
416 cells/ml followed by 76.67% at 35000 cells/ml, 73.33% at 25000 cells/ml and 63.33% at 20000  
417 cells/ml. (10). Nauplii production rates were affected by different concentrations in feed. The  
418 maximum nauplii production rate (21.66 nauplii/female) was noticed at 25000 cells/ml which  
419 was significantly higher ( $P<0.001$ ) than 15000 cells/ml followed by 35000 cells/ml ( $P<0.05$ )  
420 and there were no significant differences ( $P>0.05$ ) in the concentration found with 30000 and  
421 20000 cells/ml respectively. The lowest nauplii production (15.66 nauplii/female) was  
422 observed at low diet concentration (15000 cells/ml) which was significantly lower ( $P<0.001$ )  
423 than the other concentrations tested. (10).

424 At different feed concentrations, the total highest population density (229.3 D/L) was observed  
425 at 25000 cells/ml which was significantly higher ( $P<0.001$ ) than the rest of the concentrations  
426 tested except at 30000 cells/ml which showed a considerable significant difference ( $P<0.05$ ).  
427 The lowest population density (162 D/L) was found at 15000 cells/ml which was significantly  
428 lower ( $P<0.001$ ) compared to other concentrations tested followed by 35000 cells/ml ( $P<0.01$ )  
429 and there was no significant difference ( $P<0.05$ ) in population existed between 20000 and  
430 15000 cells/ml. Thus, in all trials, concentration significantly affects population density at  
431 different life stages. (Fig.10).



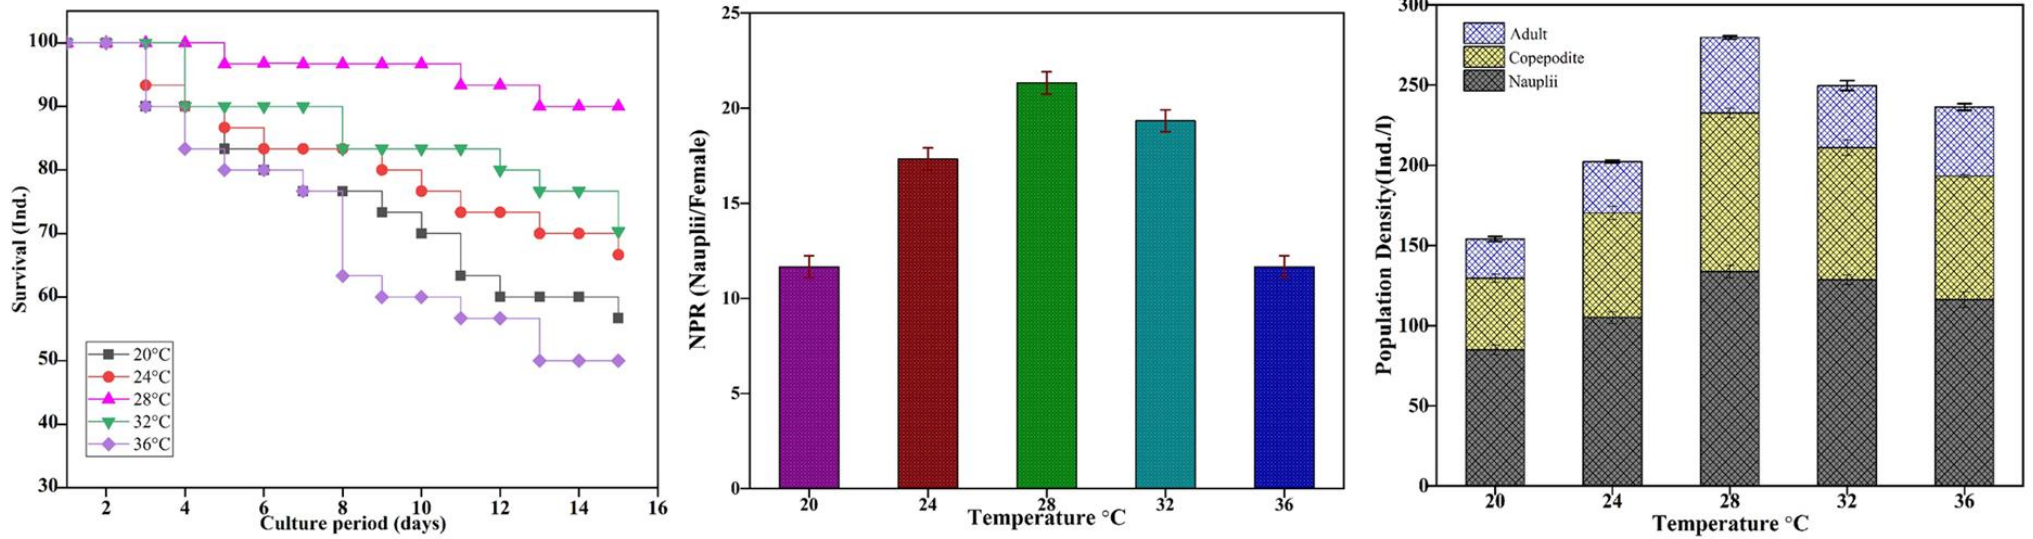

432 **Fig.5** Effect of temperature on Survival rate (SR), Nauplii production rate (NPR) and Population density (PD) of *O. dissimilis*

433

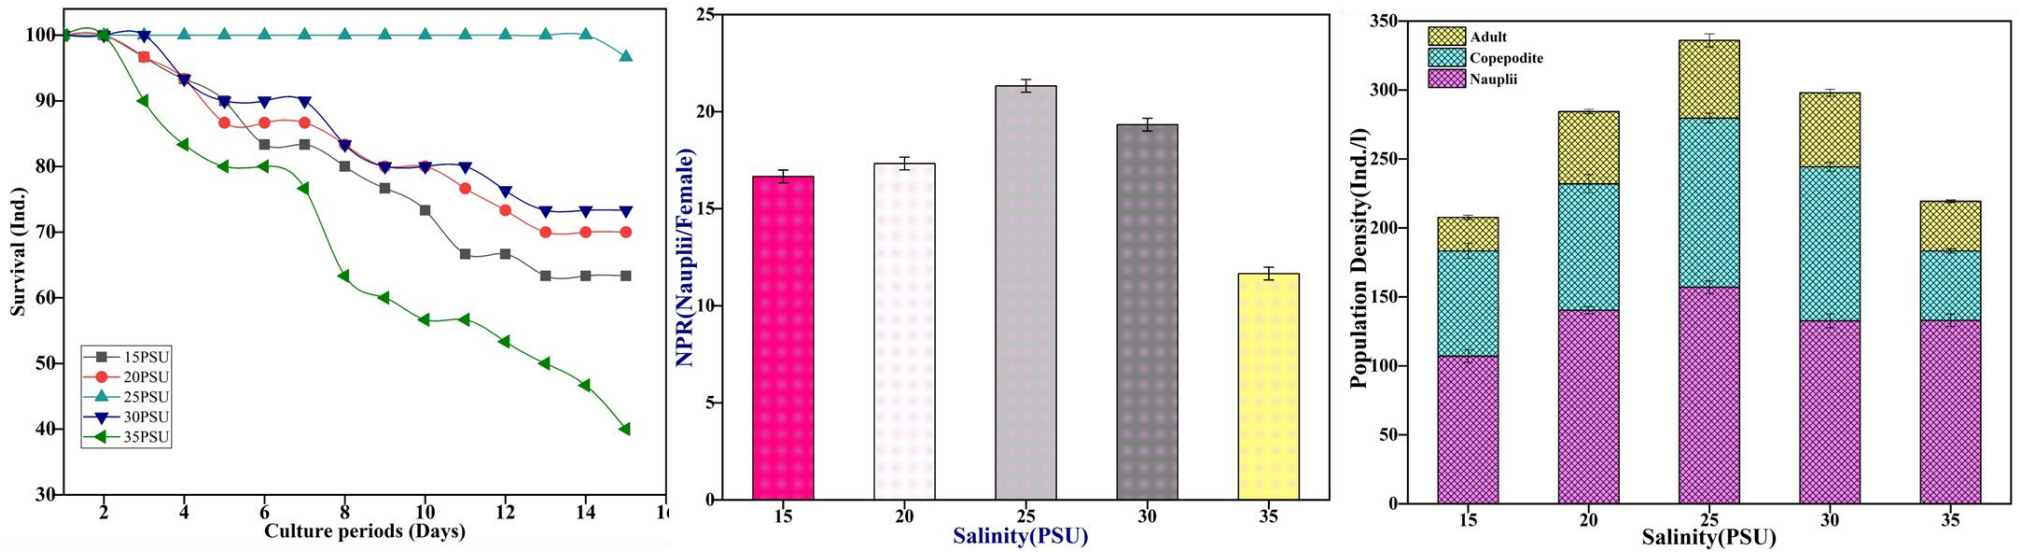

434 **Fig.6** Effect of salinity on Survival rate (SR), Nauplii production rate (NPR) and Population density (PD) of *O. dissimilis*

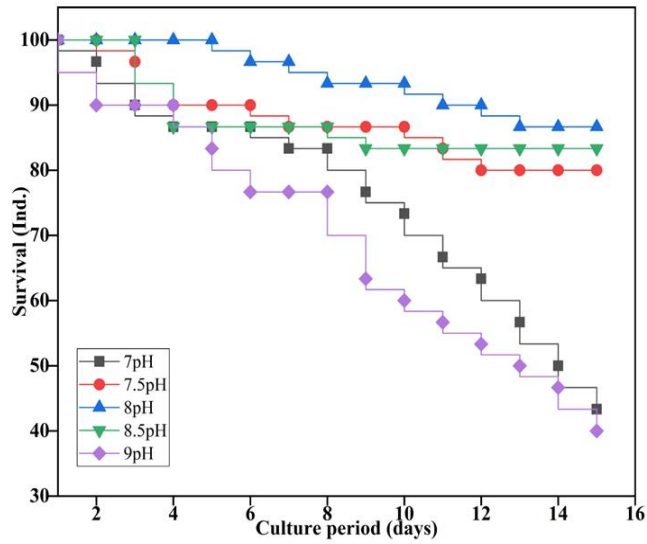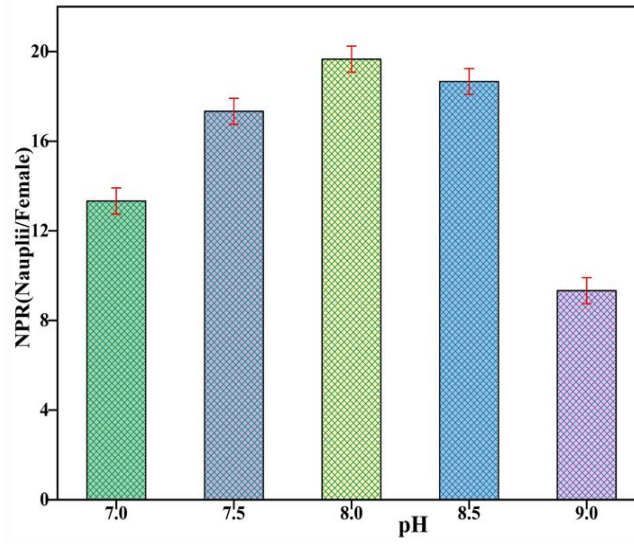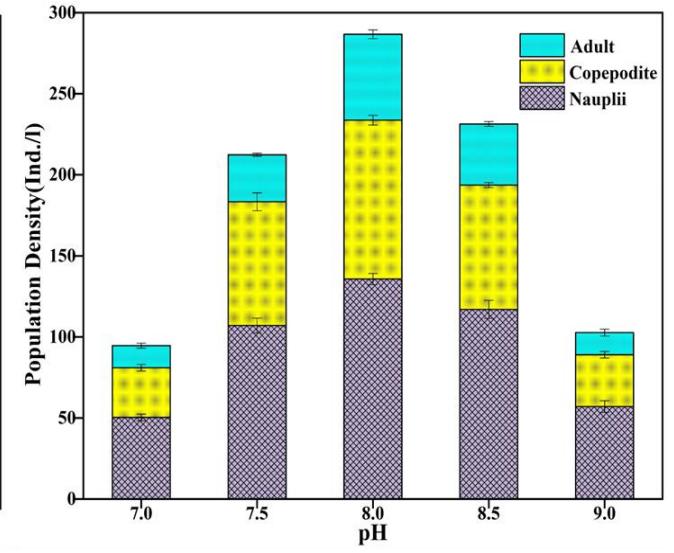

435 **Fig.7** Effect of pH on Survival rate (SR), Nauplii production rate (NPR) and Population density (PD) of *O. dissimilis*

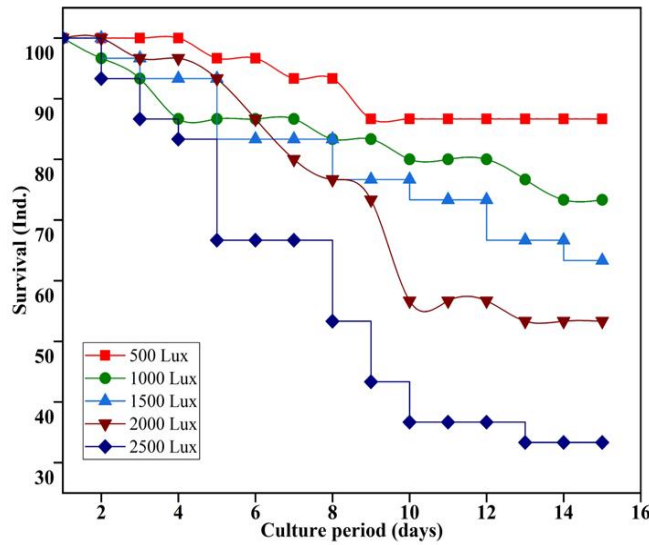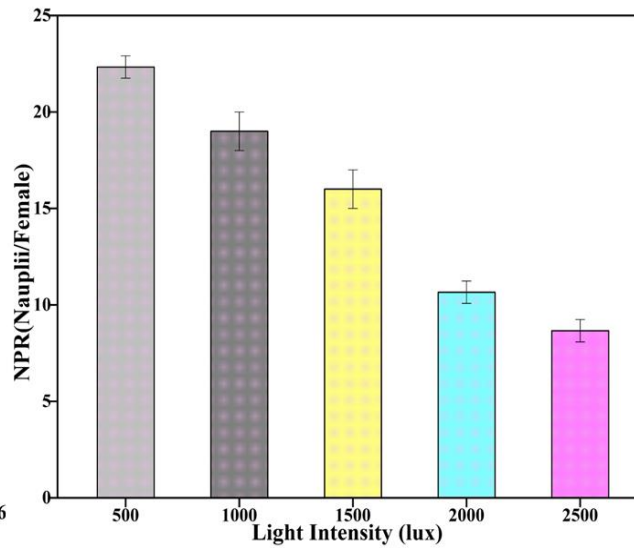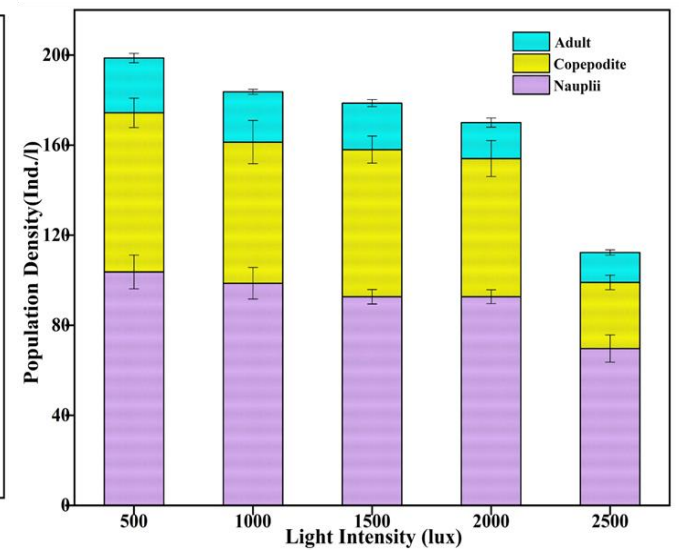

436 **Fig.8** Effect of light intensity on Survival rate (SR), Nauplii production rate (NPR) and Population density (PD) of *O. dissimilis*

437



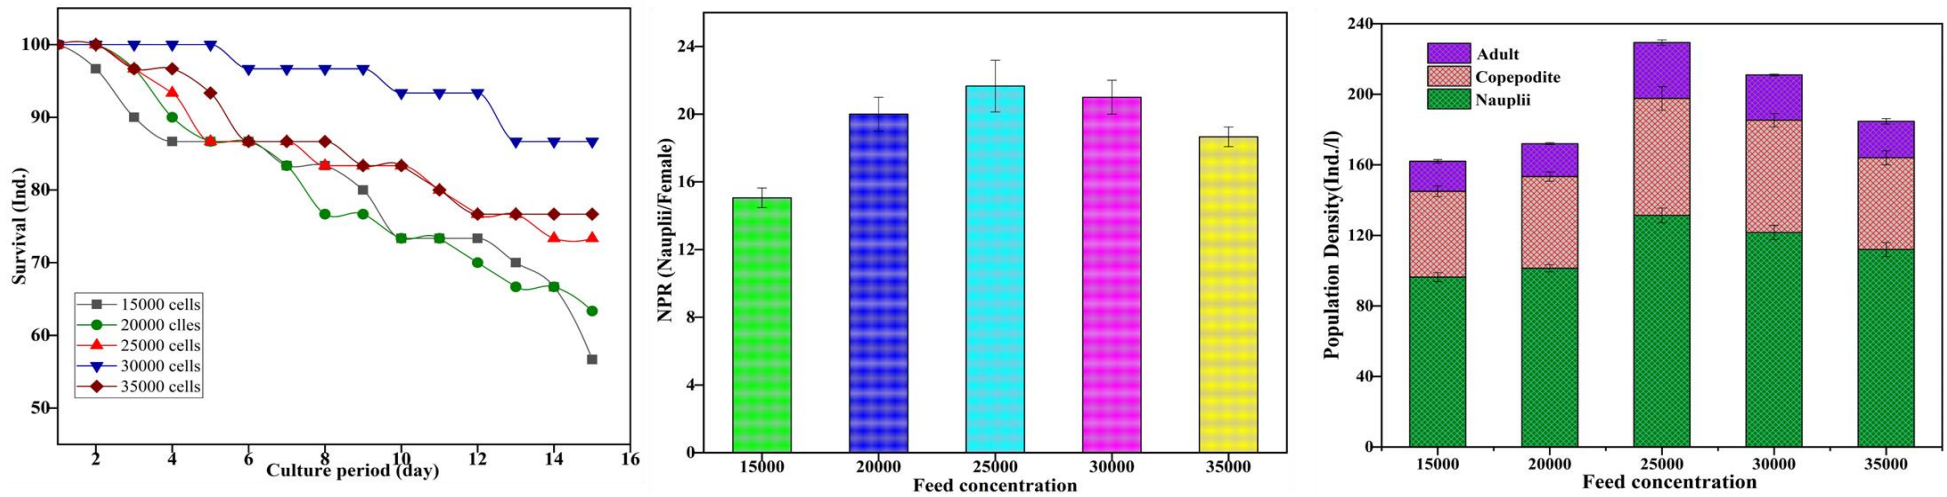

438 **Fig.9** Effect of different microalgae concentration on Survival rate (SR), Nauplii production rate (NPR) and Population density (PD) of *O. dissimilis*

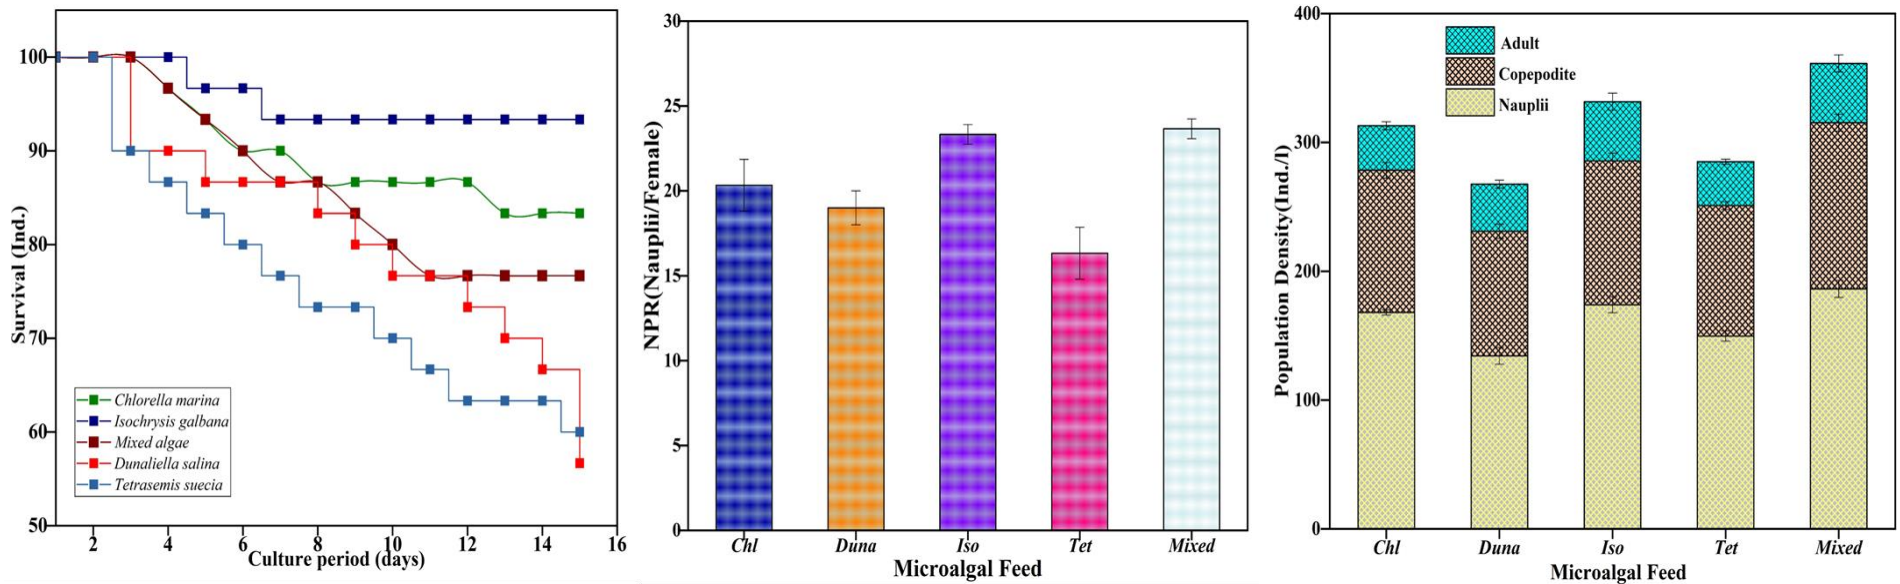

439 **Fig.10** Effect of different microalgae feed on Survival rate (SR), Nauplii production rate (NPR) and Population density (PD) of *O. dissimilis*

## 440        **DISCUSSION**

441            *Oithona*, a cyclopoid copepod, is present in high numbers and holds significant  
442 ecological importance. This marine organism is extensively distributed throughout various  
443 marine environments. Identifying copepods of this specific genus on a regular basis is still  
444 difficult because of their petite size and inconspicuous morphological features that are used for  
445 diagnosis. (Radhika et. al., 2017). The copepod, identified in our study was very well  
446 characterized by the presence of the prominent features of *O. dissimilis* based on antenna (A1)  
447 which is shorter and both are geniculate in males and descriptive features confirmed that the  
448 males are usually smaller than females, urosome was 6 segmented in male and 5 segmented in  
449 female (Inshida 1985). To differentiate species within the genus, the prominent characters being  
450 conventionally followed are based on the arrangement of setae and spines on the exopod of  
451 swimming legs 1-4 (Radhika et al., 2017). Presently, the setae and spines of P1-P4 arranged in  
452 our specimen were consistent with the keys provided by Wellershaus (1969) and hence our  
453 copepod was identified as *O. dissimilis*. Bucklin et al. (2003) have confirmed that mt COI  
454 sequence variation has been proven to be a successful marker in molecular systematic and  
455 phylogenetic evolution in copepods. The utilization of the COI gene as the DNA barcodes has  
456 been proven to be an effective marker, especially for copepods (Hill et al., 2001; Bucklin et al.,  
457 2003). This gene has also been useful to distinguish the closely related genera for species  
458 identification (Paine et al., 2007). Accordingly, we have examined the mt CO 1 gene used for  
459 the identification and discrimination of *O. dissimilis* about the phylogenetic and evolution of  
460 copepods. Molecular phylogenetic analysis based upon mt CO1 revealed that our strain is  
461 distinct from the other related copepods. Presently, we have sequenced the mt CO 1 gene and  
462 compared its molecular features with the already publically available data on different species  
463 of different families available from NCBI. The mt CO1 gene of the species collected from  
464 Nagore coastal waters was subjected to BLAST and found that intra-species (*Oithona*

465 *dissimilis*) was the most closely related species with 81% similarity (98% - Query coverage).  
466 Thus, our blast similarity was reliable with the finding of Soh et al., (2012) the individual who  
467 suggested that the CO 1 gene can be a suitable indicator for identifying species did so because  
468 it possesses sufficient variation to deal with both intra and inter-specific phylogenetic  
469 associations in invertebrates. (Soh et al., 2012). The phylogenetic relationships among *Oithona*  
470 sequences from NCBI with our selected samples using the mt COI gene were well resolved.  
471 CO 1 gene would be an appropriate biomarker for species discrimination as it has been widely  
472 employed to study population genetics and evolution (Shao and Barker, 2007). The  
473 mitochondrial genomes of animals contain a protein-coding gene that is the most conservative  
474 one found (Brown, 1985). It was found in our study that the overall mean distance for intra-  
475 specific phylogeny was found to occur in the range of 1.782 indicating that *O. dissimilis* PS-11  
476 was involved for positive evolution of Darwinian test for intra-specific phylogeny level. For  
477 inter-specific phylogeny, the overall mean distance has occurred in the range of 0.150  
478 indicating that, *O. dissimilis* PS-11 was involved in the Neutral evolution of the Darwinian test  
479 and no changes have occurred during the evolutionary process of inter-specific phylogeny. A  
480 higher level of genetic distance was found among intraspecies within our strain. The occurrence  
481 of higher levels of genetic distance in our strain with intra and inter-species levels might be due  
482 to the presence of cryptic or new species or sub-species and so on. Although the copepods have  
483 been shown to reveal higher levels of genetic divergence, sometimes the observed  
484 morphological conservatism might not follow the same level of genetic divergence. It is  
485 possible that the reason for this is the lack of separation between reproductive isolation and  
486 morphological divergence (Goetze 2003). Analysis of the CO 1 gene sequence has clearly  
487 demonstrated the occurrence of within-species variation in many crustaceans (Lefebvre et al.,  
488 2006). This variation is caused by the presence of cryptic or sibling species. The analysis has  
489 also identified similar levels of speciation in other eukaryotes (Waugh, 2007). Therefore, it is  
490 crucial to conduct detailed studies of the morphology, behaviour, and molecular characteristics

491 of a population of closely related *Oithona* species in the future. In our present study, *O.*  
492 *dissimilis* was able to survive, and produce more nauplii and population density at a  
493 temperature range of 28°C - 32°C as reported by earlier researchers for other copepods  
494 (Rajthilak et al., 2014; Peter and Downing 1984; Kaviyarasan et al., 2019; Santhanam and  
495 Perumal, 2012).

496 *O. dissimilis* exhibited a high tolerance to salinity levels in various regions, according  
497 to our study. The salinity regions that the species was able to endure were wide-ranging of 25-  
498 30 PSU. This species belongs to the family Oithonidae and generally *Oithona* groups are  
499 commonly associated with coastal areas and are abundant in brackish water habitats. Our  
500 species was able to survive and produce nauplii and population density at the salinity range of  
501 15-35 PSU. There was maximum mortality, low nauplii growth and low population density at  
502 low salinity (15 PSU) which might be due to the additional osmoregulation and respiration  
503 demands at these salinities (Kimoto et al., 1986; Santhanam 2012). The presently recorded  
504 maximum survival, nauplii production rate and total population density can be attributed  
505 towards the low light intensity of 500 Lux. The significant reduction in the production of  
506 offspring, as well as survival and growth rate of copepods, was observed with the increase in  
507 light intensity. Coping with the intense light conditions could have led to stress and energy  
508 consumption by copepods, which could be the possible mechanism for such a result.  
509 (Kaviyarasan et al., 2019; Farhadian, et al., 2014).

510 The development and fecundity of copepods are influenced by the quality of their food.  
511 Algal diets have a significant impact on the survival rate, nauplii production, and population  
512 of *O. dissimilis*. Our experiment confirmed that the copepods fed with mixed algae achieved  
513 the highest rate in terms of survival, nauplii production, and total population density. The  
514 reason for this could be that providing mono diets may lead to nutritional deficiencies in one  
515 or more vital nutrients. To minimize this risk, several researchers have suggested using mixed

516 diets since the combined nutrient contents would fulfil the nutritional requirements of the target  
517 species (Brown et al., 1989; Santhanam and Perumal 2012; Smith et al., 1992). In response to  
518 feed concentration, the copepods had the highest survival rate, nauplii production and higher  
519 population density supplied with a higher concentration of algal cells but the ratio has declined  
520 in copepods supplied with a low concentration of algal cells (15000 cells/ml) might be due to  
521 food scarcity. Since food is one of the important factors in enhancing better growth and density  
522 of copepods in the culture systems, the copepod population increased in direct proportion to  
523 the increased food supply and poor results were obtained at low food concentrations (Schippe  
524 et al., 2009; Santhanam and Perumal 2012).

## 525 **CONCLUSION**

526 Through a comprehensive study, we were able to successfully achieve the accurate  
527 identification of *O. dissimilis*. This involved a thorough examination of both morphological  
528 and molecular characteristics. Additionally, we were able to establish an optimization  
529 technique for commercial mass culture of this species under laboratory conditions. Our  
530 experimentation revealed that certain factors played a crucial role in the survival rates,  
531 population numbers, and nauplii hatching of *O. dissimilis*. Specifically, we found that a salinity  
532 level of 25 PSU, a temperature ranges of 24-28°C, a pH of 8, 500 lux of light, and a mixed diet  
533 with moderate to high concentration led to superior results for this particular species. Given  
534 these findings, we believe that *O. dissimilis* represents a viable live feed option for Aquaculture.  
535 Furthermore, the insights gleaned from our experiment could be utilized to develop an  
536 improved, commercial-scale copepod culturing system in the future. Overall, this study has  
537 important implications for the aquaculture industry and could contribute to the development of  
538 more sustainable and efficient practices.

539

540 **ACKNOWLEDGMENTS**

541 The authors are extremely thankful to Bharathidasan University for providing the necessary  
542 facilities. The Ministry of Environment, Forest and Climate Change (MoEF & CC), Govt. of  
543 India, New Delhi, for providing financial support through a research Project MoEF & CC (F.  
544 No. 220180/06/2015-RE (Tax) 5th October 2016). One of the author (P. Raju) thank The  
545 Department of Biotechnology (DBT), Govt. of India, is greatly acknowledged for the copepod  
546 culture facility provided (BT/PR 5856/AAQ/3/598/2012).

547 **AUTHOR CONTRIBUTIONS** P. Raju: Data curation, methodology, Formal analysis,  
548 Writing-original draft; P. Santhanam: Conceptualization, Resources, Supervision, Funding,  
549 visualization, Writing-review & editing; B. Balaji Prasath: Data curation, Writing-review &  
550 editing; M. Divya: Formal analysis; R. Prathiviraj: Writing-review & editing; S. Gunabal:  
551 Formal analysis; and P. Perumal: Writing-review & editing.

552 **CONFLICT OF INTEREST STATEMENT**

553 The authors declare no conflict of interest

554 **REFERENCE**

- 555 Ajiboye, O.O., Yakubu, A.F., Adams, T.E., Olaji, E.D. and Nwogu, N.A. (2011) A review of  
556 the use of copepods in marine fish larviculture. *Rev. Fish Biol. Fisher*, 21, 225-246.
- 557 Boxshall, G. and Hasley, S.H., (2004) *An Introduction to Copepod Diversity*, edited by: Series.  
558 TRS, Ray Society: London.
- 559 Brown, M.R. and Miller, K.A. (1992) The ascorbic acid content of eleven species of microalgae  
560 used in mariculture. *J. Appl. Phycol.* 4, 205-215.
- 561 Brown, W.M. (1985) The mitochondrial genome of animals. In "Molecular Evolutionary  
562 Genetics" (RJ MacIntyre, Ed.). Plenum, New York. *Evol*, 6, 399-411.
- 563 Bucklin, A., Frost, B., Bradford-Grieve, J., Allen, L. and Copley, N. (2003) Molecular  
564 systematic and phylogenetic assessment of 34 calanoid copepod species of the  
565 Calanidae and Clausocalanidae. *Mar. Biol.* 142, 333-343.



- 566 Bucklin, R.H.L.A.A. (2001) Multiplexed species-specific PcR protocol to discriminate four N.  
567 Atlantic Calamus species, with an mtCOI gene tree for ten. Mar. Biol, 139, 279-287.
- 568 Castro, L.R., Claramunt, G., González, H.E., Krautz, M.C., Llanos-Rivera, A., Méndez, J.,  
569 Schneider, W. and Soto, S. (2010) Fatty acids in eggs of Anchoveta *Engraulis ringens*  
570 during two contrasting winter spawning seasons. Mar. Ecol. Prog Ser. 420, 193-205.
- 571 Chew, L.L. and Chong, V.C. (2011) Copepod community structure and abundance in a tropical  
572 mangrove estuary, with comparisons to coastal waters. Hydrobio, 666, 127-143.
- 573 Chilmawati, D. (2016) The Effect of Different Diet of Phytoplankton Cells on Growth  
574 Performance of Copepod, *Oithona* sp. in Semi-mass Culture. Aquat. Pr. 7, 39-45.
- 575 Davis, C.C. (1955) The marine and fresh-water plankton (Vol. 369). Michigan Michigan State  
576 University Press.
- 577 Dvoretzky, V.G. and Dvoretzky, A.G. (2015) Interannual variations in abundance and biomass  
578 of planktonic copepods *Oithona* in the Barents Sea. Biol Bull. 42, 449-457.
- 579 Farhadian, O., Md Yusoff, F. and Arshad, A. (2014) Effects of salinity, temperature, light  
580 intensity and light regimes on production, growth and reproductive parameters of  
581 *Apocyclops dengizicus*. Iran. J Fish Sci. 13, 30-46.
- 582 Felsenstein, J., 1985. Confidence limits on phylogenies: an approach using the bootstrap.  
583 evolution, 39(4), pp.783-791.
- 584 Georgina D, Leocadio Blanco-Bercial C, Bucklin A, Beron CM, Vinas MD. (2012) Molecular  
585 systematics of three species of *Oithona* (Copepoda, Cyclopoida) from the Atlantic  
586 Ocean: comparative analysis using 28S rDNA. PlusOne. 7: e35861. doi:  
587 10.1371/journal.pone.003586.
- 588 Goetze, E. (2003) Cryptic speciation on the high seas; global phylogenetics of the copepod  
589 family Eucalanidae. P. Roy. Soc. Lond. B Bio. Series B: Biological Sciences, 270, 2321-  
590 2331.
- 591 Hernandez Molejon, O.G., and L. Alvarez-Lajonchere. (2003) Culture experiments with  
592 *Oithona oculata* Farran, 1913 (Copepoda: Cyclopoida), and its advantages as food for  
593 marine fish larvae. Aquat. 219, 471-483.
- 594 Hill, R., Allen, L. and Bucklin, A. (2001) Multiplexed species-specific PCR protocol to  
595 discriminate four N. Atlantic Calanus species, with an mt COI gene tree for ten Calanus  
596 species. Mar. Biol. 139, 279-287.



- 597 Inshida, S. (1985) Taxonomy and distribution of the family Oithonidae (Copepoda,  
598 Cyclopoida) in the Pacific and Indian Oceans. Bull. Ocean Res. Inst., Univ. Tokyo, 20,  
599 1-167.
- 600 James, C.M. and Al-Khars, A.M. (1986) Studies on the production of planktonic copepods for  
601 aquaculture. Syllogeus, 58, 333-340.
- 602 Jeyaraj, N. and Santhanam, P. (2013) Influence of algal diet on population density, egg  
603 production and hatching succession of the calanoid copepod, *Paracalanus parvus*  
604 (Claus, 1863). J. Algal Biomass Utiliz. 4, 1-8.
- 605 Kasturirangan, L.R. (1963) A Key for the Identification of the more common planktonic  
606 copepoda: of Indian coastal waters (No. 2). Council of Scientific & Industrial Research.
- 607 Kaviyarasan, M. and Santhanam, P. (2019) A Technique on the Culture and Preservation of  
608 Marine Copepod Eggs. In Basic and Applied Zooplankton Biology 197-208. Springer,  
609 Singapore.
- 610 Kaviyarasan, M., Santhanam, P., Ananth, S., Kumar, S.D., Raju, P. and Kandan, S. (2020)  
611 Population growth, nauplii production and post-embryonic development of  
612 *Pseudodiaptomus Annandale* (Sewell, 1919) in response to temperature, light intensity,  
613 pH, salinity and diets. Indian J. Geo-Mar. Sci. 49, 1000-1009.
- 614 Kimoto, K., Uye, S. and Onbe, T. (1986) Growth characteristics of a brackish-water calanoid  
615 copepod *Sinocalanus tenellus* about temperature and salinity. Bull. Plankton Soc.  
616 Japan.33, 4357.
- 617 Kumar, S., Stecher, G. and Tamura, K. (2016) MEGA7: molecular evolutionary genetics  
618 analysis version 7.0 for bigger datasets. Mol. Biol. Evol. 33, 1870-1874.
- 619 Lee, W., Soh, H.Y., Kwon, S.W. and Yoon, Y.H. (2012) A new Pseudodiaptomus (Copepoda,  
620 Calanoida) from Korea supported by molecular data. Zootaxa, 3368.
- 621 Li, C., Luo, X., Huang, X. and Gu, B. (2008) Effects of temperature, salinity, pH, and light on  
622 filtering and grazing rates of a calanoid copepod (*Schmackeria dubia*). Sci. World. J. 8,  
623 1219-1227.
- 624 Liu, T. (2004) Effect of acidity-alkalinity on the growth of *Acartia spinicauda*. China Fish, 12,  
625 74-75.

- 626 Lo, W.T., Chung, C.L. and Shih, C.T. (2004) Seasonal distribution of copepods in Tapong Bay,  
627 southwestern Taiwan. *Zool. Stud.* 43, 464-474.
- 628 Macedo, C.F. and Pinto-Corlho, R.M. (2001) Nutritional status response of *Daphania laevis*  
629 and *Moina micura* from a tropical reservoir to different algal diets: *Scenedesmus*  
630 *quadricauda* and *Ankistrodesmus gracilis*. *Braz. J Biol.* 61, 555-562.
- 631 McKinnon, A.D. and Ayukai, T. (1996) Copepod egg production and food resources in  
632 Exmouth Gulf, Western Australia. *Mar. Freshwater Res.* 47, 595-603.
- 633 McManus, G.B. and Katz, L.A. (2009) Molecular and morphological methods for identifying  
634 plankton: what makes a successful marriage? *J. Plankton Res.* 31, 1119-1129.
- 635 Miliou, H. (1992) Effects of light (photoperiod, spectral composition) on the population  
636 dynamics of *Tisbe holothuriae* Humes (Copepods, Harpacticoida). *Hydrobio.* 232, 201-  
637 209.
- 638 Nielsen, T. and Andersen, C. (2002) Plankton community structure and production along a  
639 freshwater-influenced Norwegian fjord system. *Mar. Biol.* 141, 707-724.
- 640 Oka, S. and Saisho, T. (1994) Occurrence of zooplankton in Sumiyo Bay, Amamiyoshima Island.  
641 Composition and abundance in the estuary and surf zone in winter season. *Mem. Fac.*  
642 *Fish Kagoshima Univ.* 43, 51-59.
- 643 Omori, M. and Ikeda, T. (1984) Distribution and community structure. *Methods in marine*  
644 *zooplankton ecology.* Wiley-Interscience Publication. 253-279.
- 645 Paffenhöfer, G.A. (1993) On the ecology of marine cyclopoid copepods (Crustacea,  
646 Copepoda). *J. Plankton Res.* 15, 37-55.
- 647 Paine, M.A., McDowell, J.R. and Graves, J.E. (2007) Specific identification of western Atlantic  
648 Ocean scombrids using mitochondrial DNA cytochrome c oxidase subunit I (COI) gene  
649 region sequences. *B. Mar. Sci.* 80, 353-367.
- 650 Pedersen, M.F. and Hansen, P.J. (2003) Effects of high pH on a natural marine planktonic  
651 community. *Mar. Ecol. Prog. Ser.* 260, 19-31.
- 652 Perumal, P., Sampathkumar, P. and Santhanam, P. (1998) Zooplankton of Parangipettai coastal  
653 waters. *Monog. S.* 1, 31.

- 654 Peters, R.H. and Downing, J.A., 1984. Empirical analysis of zooplankton filtering and feeding  
655 rates 1. *Limnol. Oceanogr.* 29, 763-784.
- 656 Radhika, R., Bijoy Nandan, S. and Harikrishnan, M. (2017) Morphological and molecular  
657 identification of marine copepod *Dioithona rigida* Giesbrecht, 1896 (Crustacea:  
658 Cyclopoida) based on mitochondrial COI gene sequences, from Lakshadweep Sea,  
659 India. *Mitochondria. DNA* 28, 872-879.
- 660 Rajthilak, C., Santhanam, P., Anusuya, A., Pazhanimuthu, A., Ramkumar, R., Jeyaraj, N. and  
661 Perumal, P. (2014) Laboratory culture and population growth of brackish water  
662 harpacticoid copepod, *Nitokra affinis* (Gurney, 1927) under different temperatures,  
663 salinities and diets. *World J. Fish Mar. Sci.* 6, 72-78.
- 664 Rajthilak, C., Santhanam, P., Raja, M., Suman, T.Y., Rajasree, S.R., Ramkumar, R. and  
665 Perumal, P. (2015) First distributional record of *Nitokra affinis* Gurney, 1927  
666 (Copepoda: Harpacticoida: Ameiridae) from Vellar estuary (south-east India): structural  
667 and molecular evidence. *Mar. Biodiv. Rec.* 8.
- 668 Saitoh, S.I., Suzuki, H., Hanzawa, N. and Tamate, H.B. (2011) Species diversity and  
669 community structure of pelagic copepods in the marine lakes of Palau. *Hydrobio.* 666,  
670 85-97.
- 671 Saitou, N. and Nei, M. (1987) The neighbor-joining method: a new method for reconstructing  
672 phylogenetic trees. *Mol. Biol. Evol.* 4, 406-425.
- 673 Saiz, E., Calbet, A. and Broglio, E. (2003) Effects of small-scale turbulence on copepods: The  
674 case of *Oithona davisae*. *Limnol. Oceanogr.* 48, 1304-1311.
- 675 Santhanam, P. and Perumal, P. (2012) Effect of temperature, salinity and algal food  
676 concentration on population density, growth and survival of marine copepod *Oithona*  
677 *rigida* Giesbrecht. *Indian J. Geo-Mar. Sci.* 41, 369-376.
- 678 Santhanam, P. and Perumal, P. (2012) Feeding, survival, egg production and hatching rate of  
679 the marine copepod *Oithona rigida* Giesbrecht (Copepoda: Cyclopoida) under  
680 experimental conditions. *J. Mar. Biol. Asso. India*, 54, 38-44.
- 681 Santhanam, P., Jeyaraj, N. and Jothiraj, K. (2013) Effect of temperature and algal food on egg  
682 production and hatching of copepod, *Paracalanus parvus*. *J. Environ. Biol.* 34, 243-  
683 246.

- 684 Schipp, G.R., Bosmans, J.M. and Marshall, A.J. (1999) A method for hatchery culture of  
685 tropical calanoid copepods, *Acartia* spp. *Aquat*, 174, 81-88.
- 686 Shao, R. and Barker, S.C. (2007) Mitochondrial genomes of parasitic arthropods: implications  
687 for studies of population genetics and evolution. *Parasi*, 134, 153.
- 688 Smith, L.L., Biedenbach, J.M. and Lawrence, A.L. (1992) Penaeid larviculture: Galveston  
689 method. *Developments in aquaculture and fisheries science*, 23, 171-191.
- 690 Tamura, K., Dudley, J., Nei, M. and Kumar, S. (2007) MEGA4: molecular evolutionary  
691 genetics analysis (MEGA) software version 4.0. *Mol. Biol. Evol.* 24, 1596-1599.
- 692 Tamura, K., Nei, M. and Kumar, S. (2004) Prospects for inferring very large phylogenies by  
693 using the neighbour-joining method. *P. Natl. Acad. Sci-Biol.* 101, 11030-11035.
- 694 Van Noord, J.E., Lewallen, E.A. and Pitman, R.L. (2013) Flying fish feeding ecology in the  
695 eastern Pacific: prey partitioning within a speciose epipelagic community. *J. Fish Biol.*  
696 83, 326-342.
- 697 Waugh, J. (2007) DNA barcoding in animal species: progress, potential and pitfalls. *Bioassay*,  
698 29, 188-197.
- 699 Zamora-Terol, S., Kjellerup, S., Swalethorp, R., Saiz, E. and Nielsen, T.G. (2014) Population  
700 dynamics and production of the small copepod *Oithona* spp. in a subarctic fjord of West  
701 Greenland. *Polar Biol*, 37, 953-965.
- 702 Zhang, G.T., Sun, S. and Yang, B. (2007) Summer reproduction of the planktonic copepod  
703 *Calanus sinicus* in the Yellow Sea: influences of high surface temperature and cold  
704 bottom water. *J. Plankton Res.* 29, 179-186.

## Graphical abstract

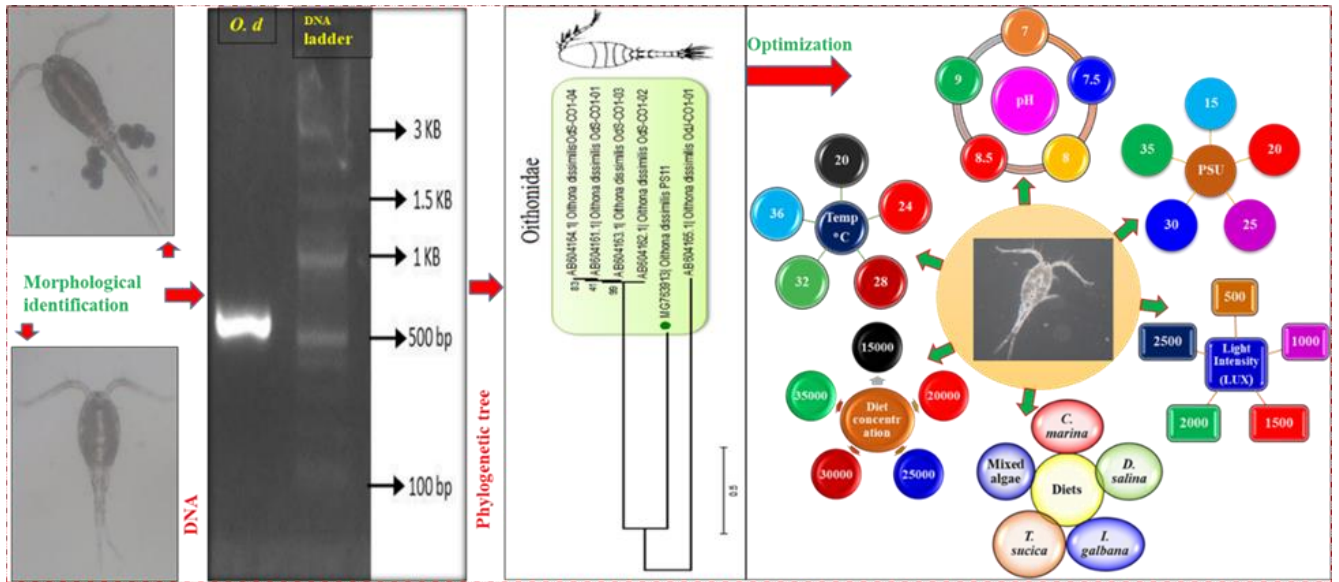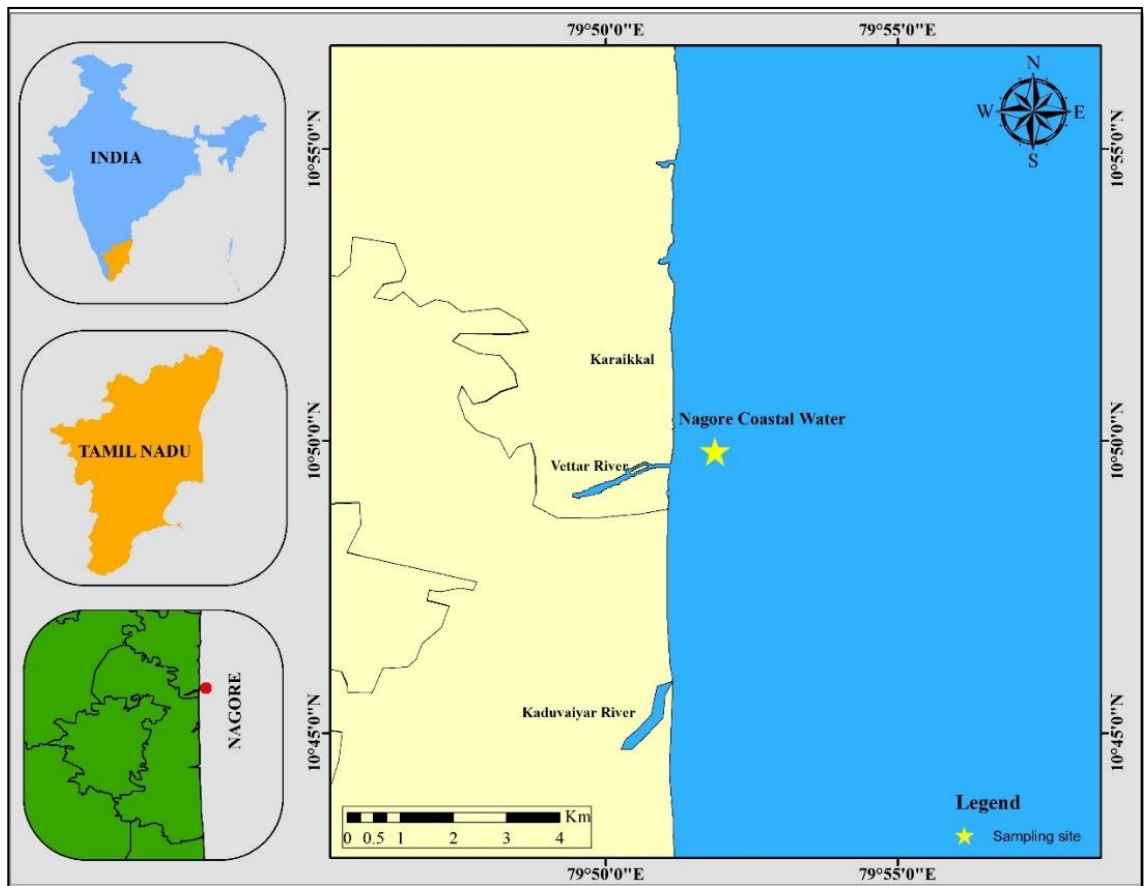

Fig. 1. Map of the Nagore coastal waters showing the collection site.

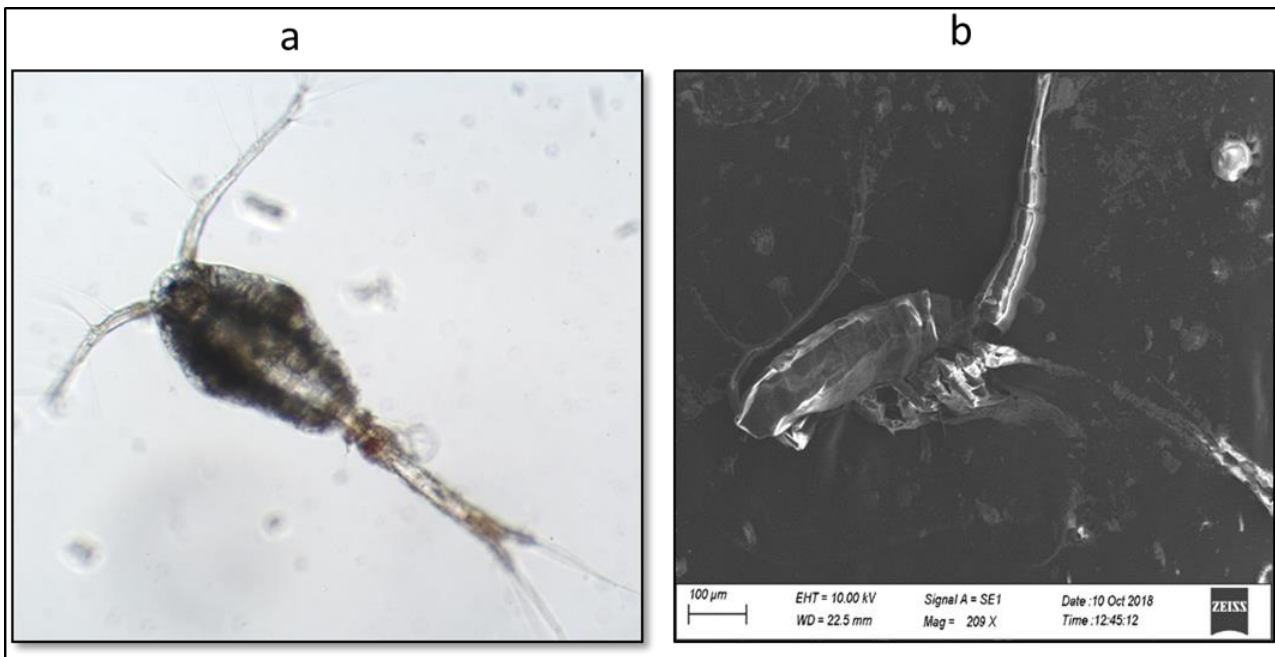

Fig. 2. Stereo phase-contrast microscopic (a) and scanning electron microscopic (b) images of *O. dissimilis*.

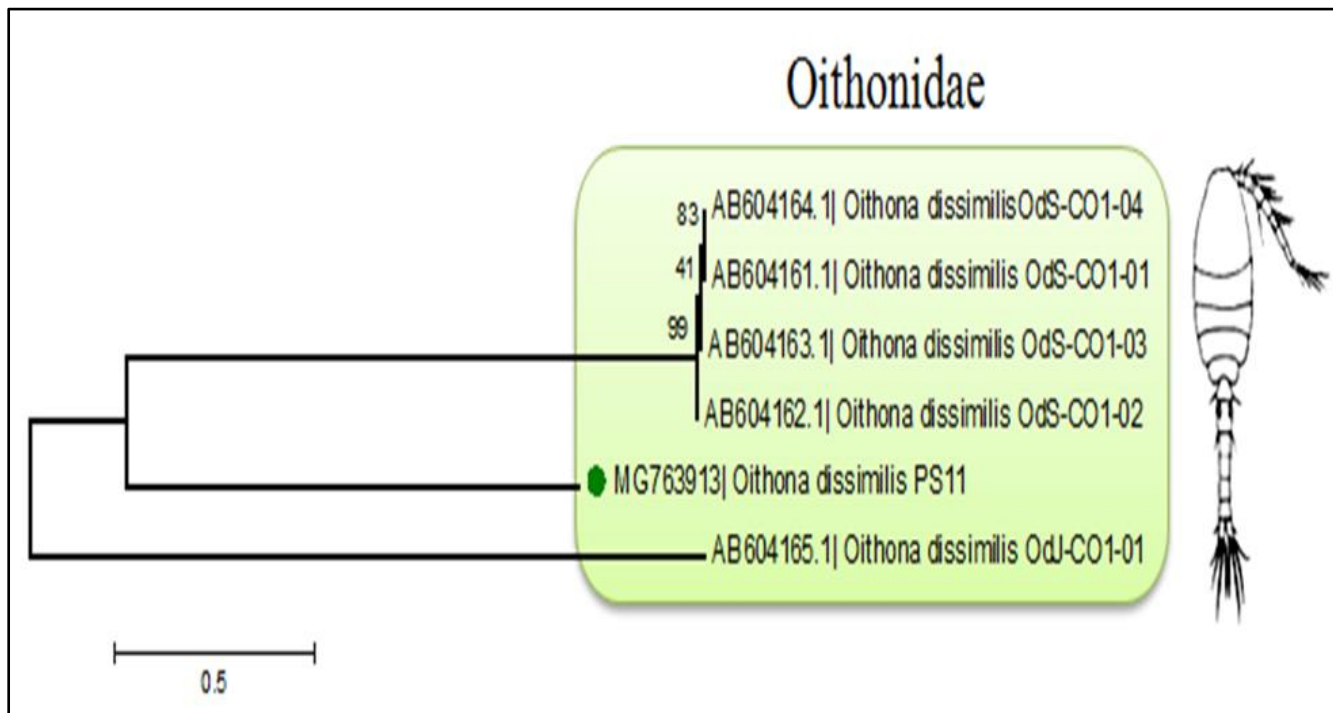

Fig. 3. Construction of inter-specific phylogenetic tree of COI gene of *O. dissimilis* PS-11 from its closely related sequences obtained from MEGA 7.0. The green colour bullet differentiates our target sequences.



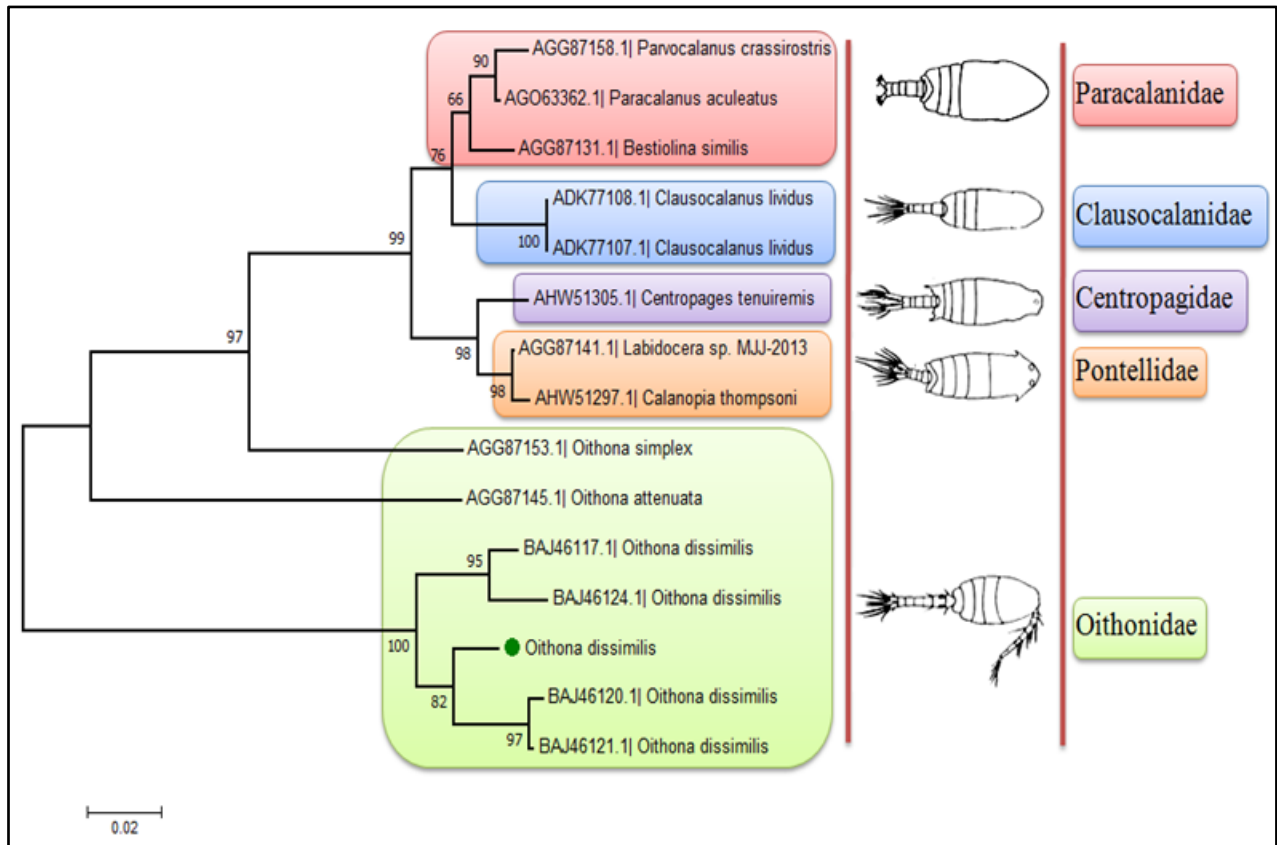

Fig. 4. Construction of inter-specific protein-based phylogenetic tree of COI gene of *O. dissimilis* PS-11 from its closely related sequences obtained from MEGA 7.0. The green colour bullet differentiates our target sequence.



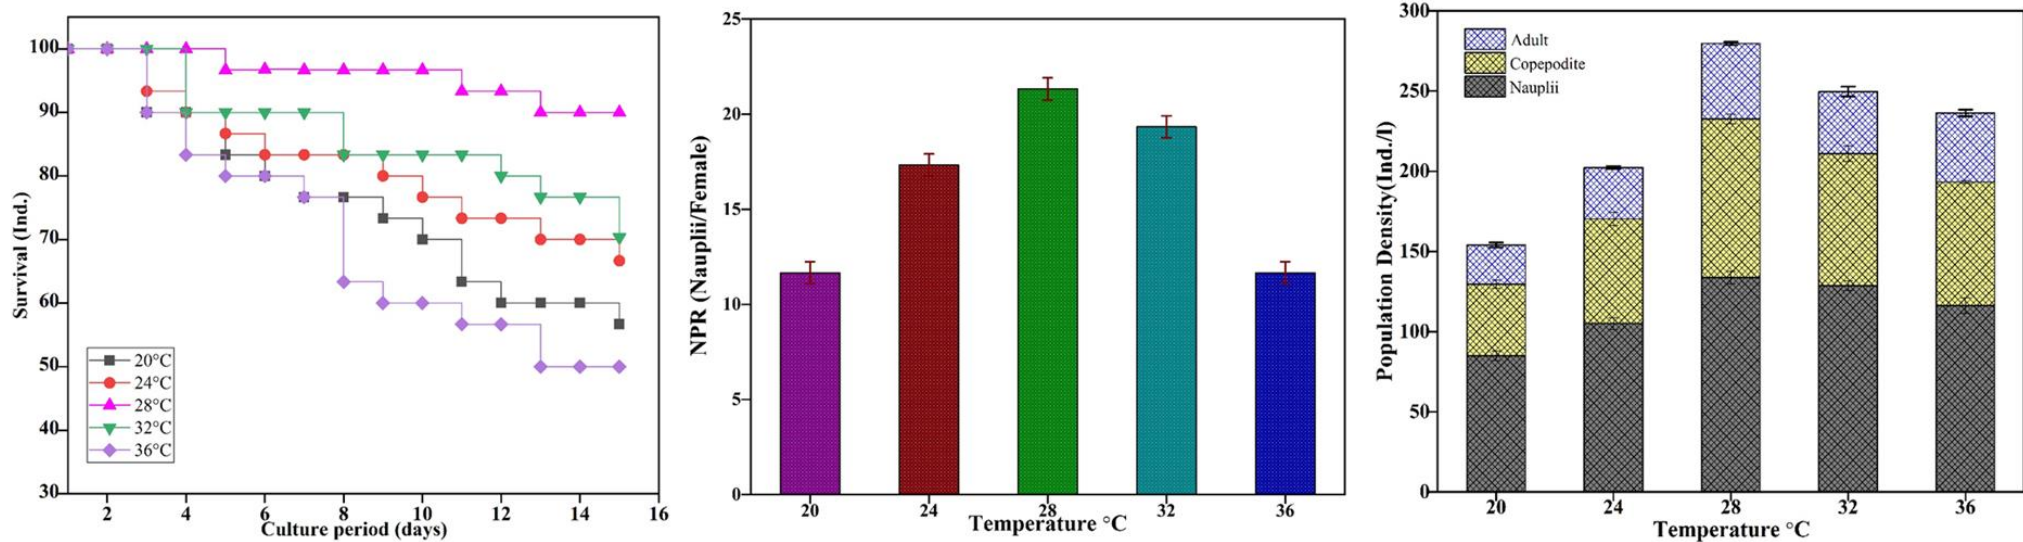

Fig.5 Effect of temperature on Survival rate (SR), Nauplii production rate (NPR) and Population density (PD) of *O. dissimilis*

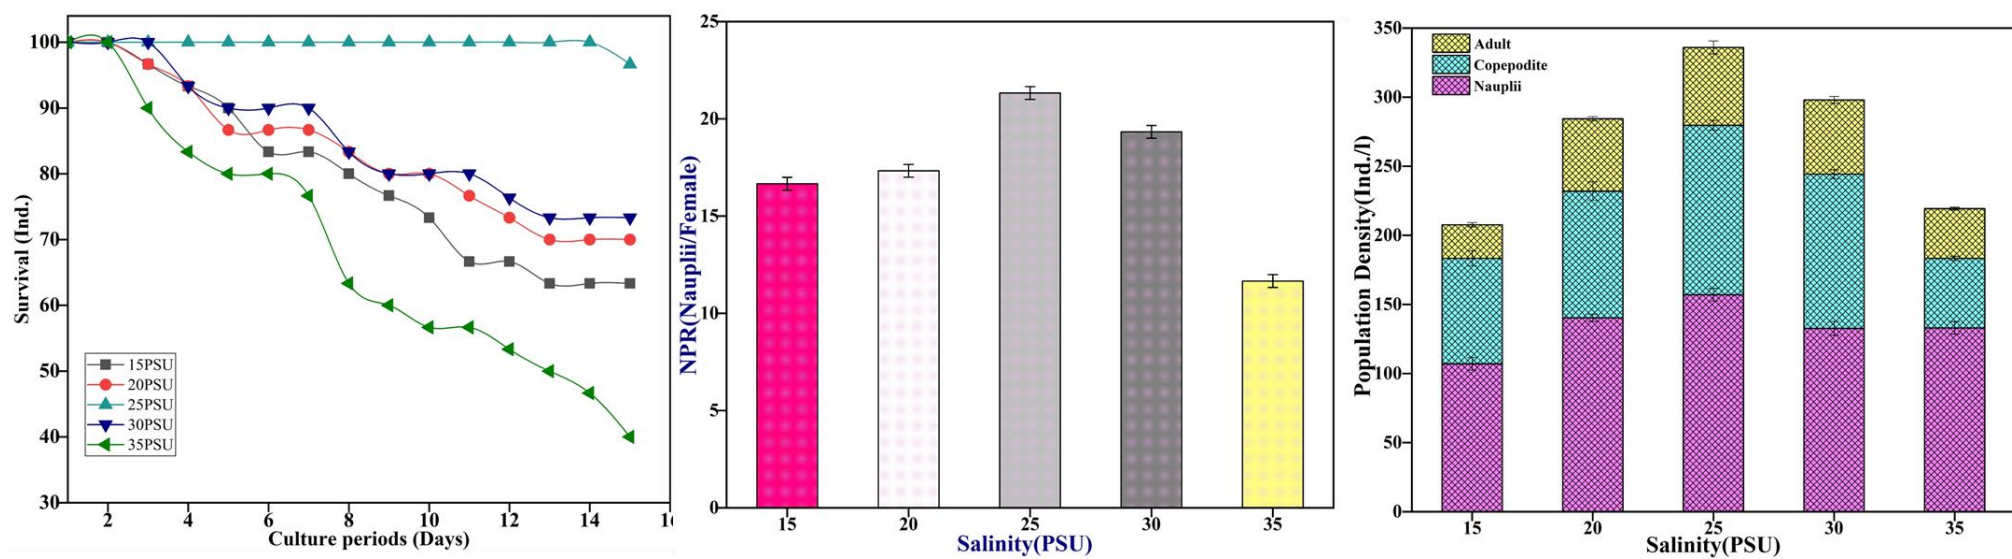

Fig.6 Effect of salinity on Survival rate (SR), Nauplii production rate (NPR) and Population density (PD) of *O. dissimilis*

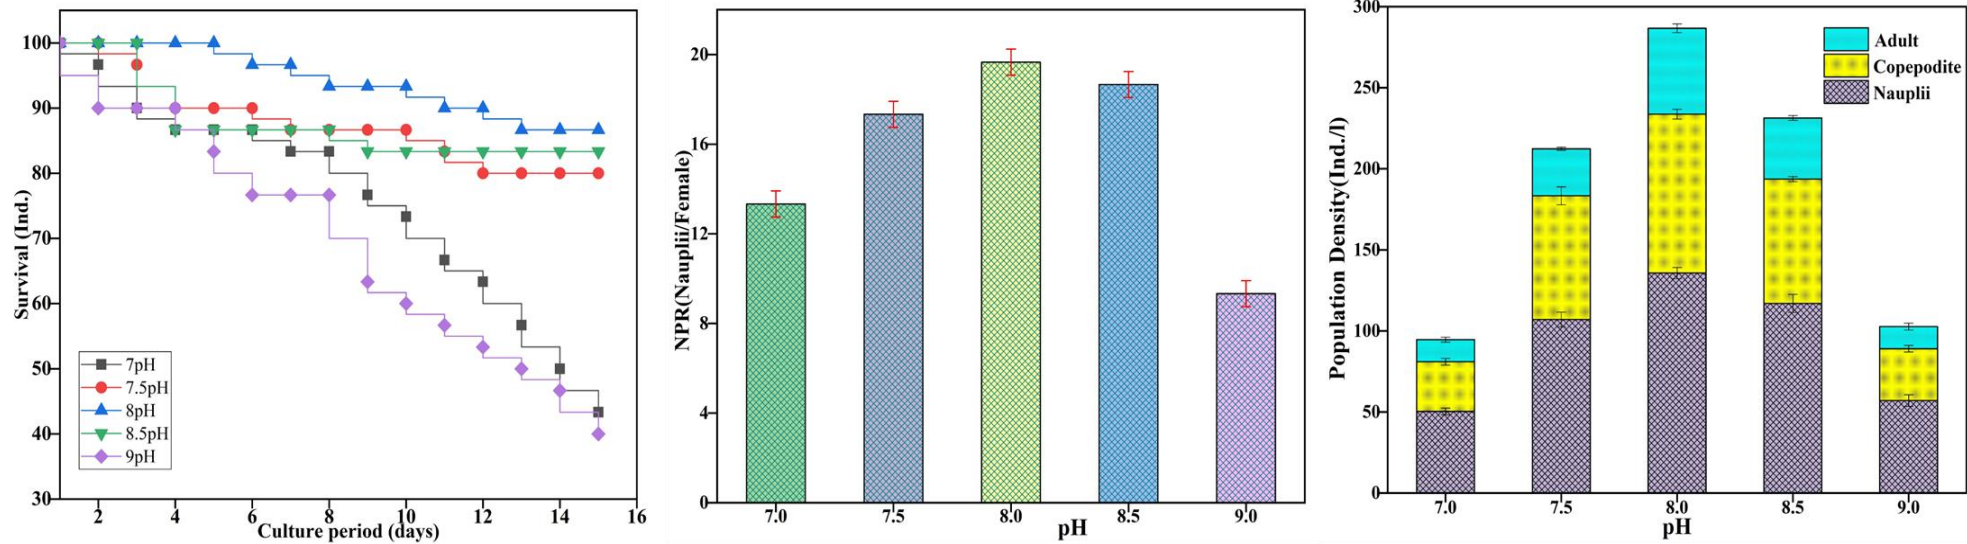

Fig.7 Effect of pH on Survival rate (SR), Nauplii production rate (NPR) and Population density (PD) of *O. dissimilis*

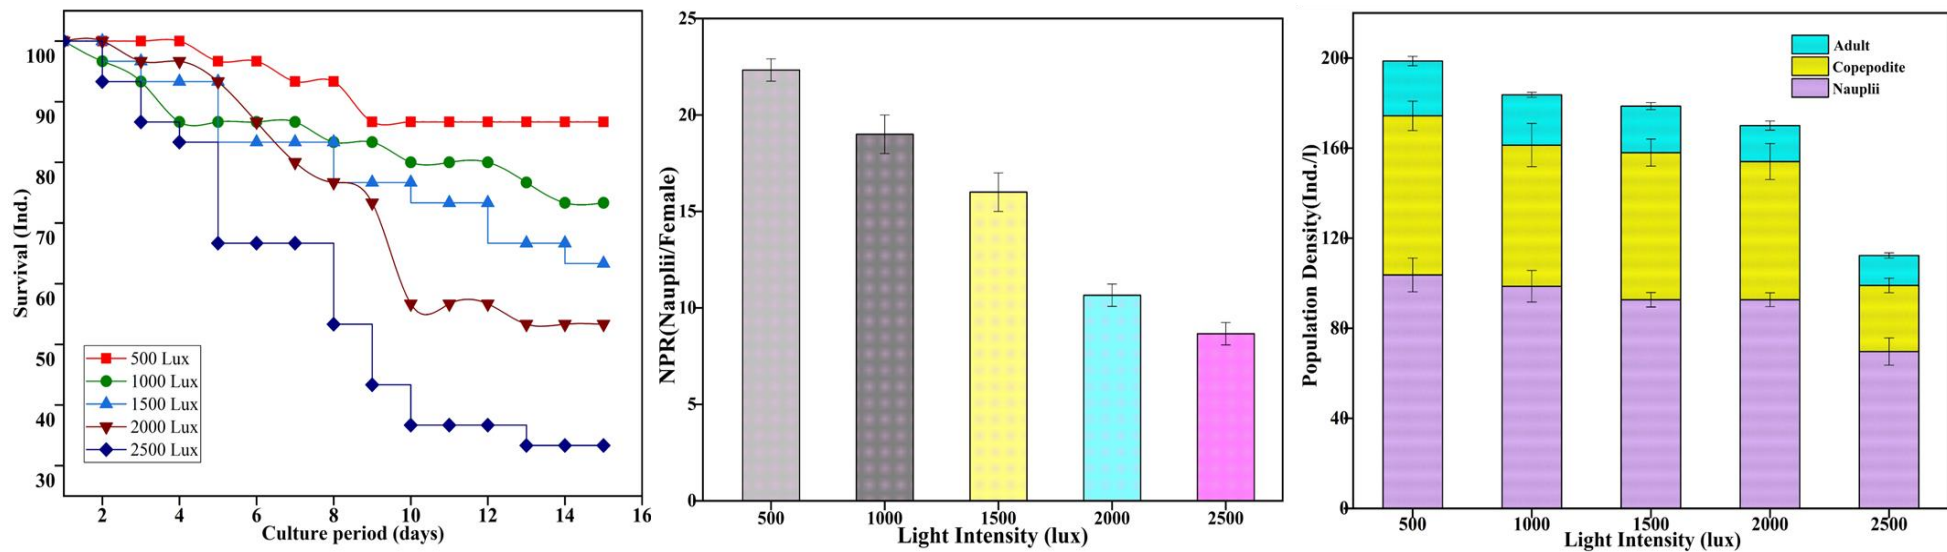

Fig.8 Effect of light intensity on Survival rate (SR), Nauplii production rate (NPR) and Population density (PD) of *O. dissimilis*



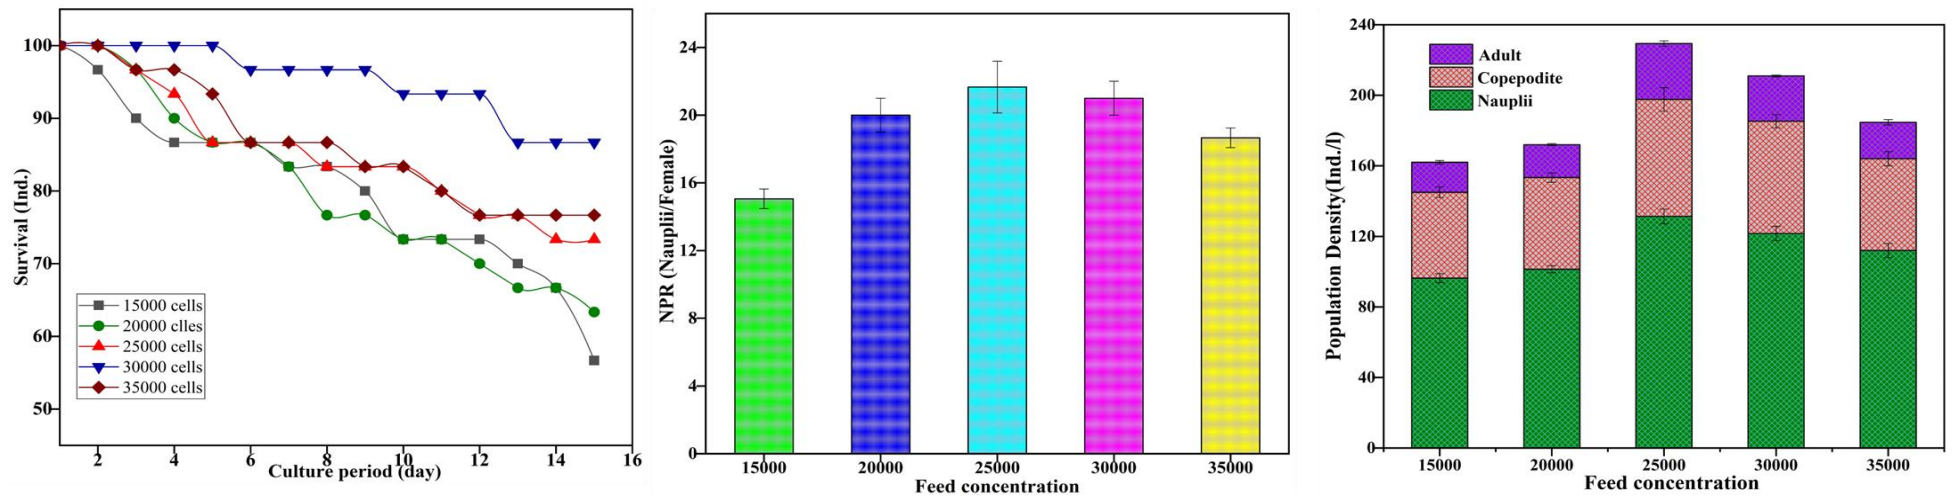

**Fig.9** Effect of different microalgae concentration on Survival rate (SR), Nauplii production rate (NPR) and Population density (PD) of *O. dissimilis*

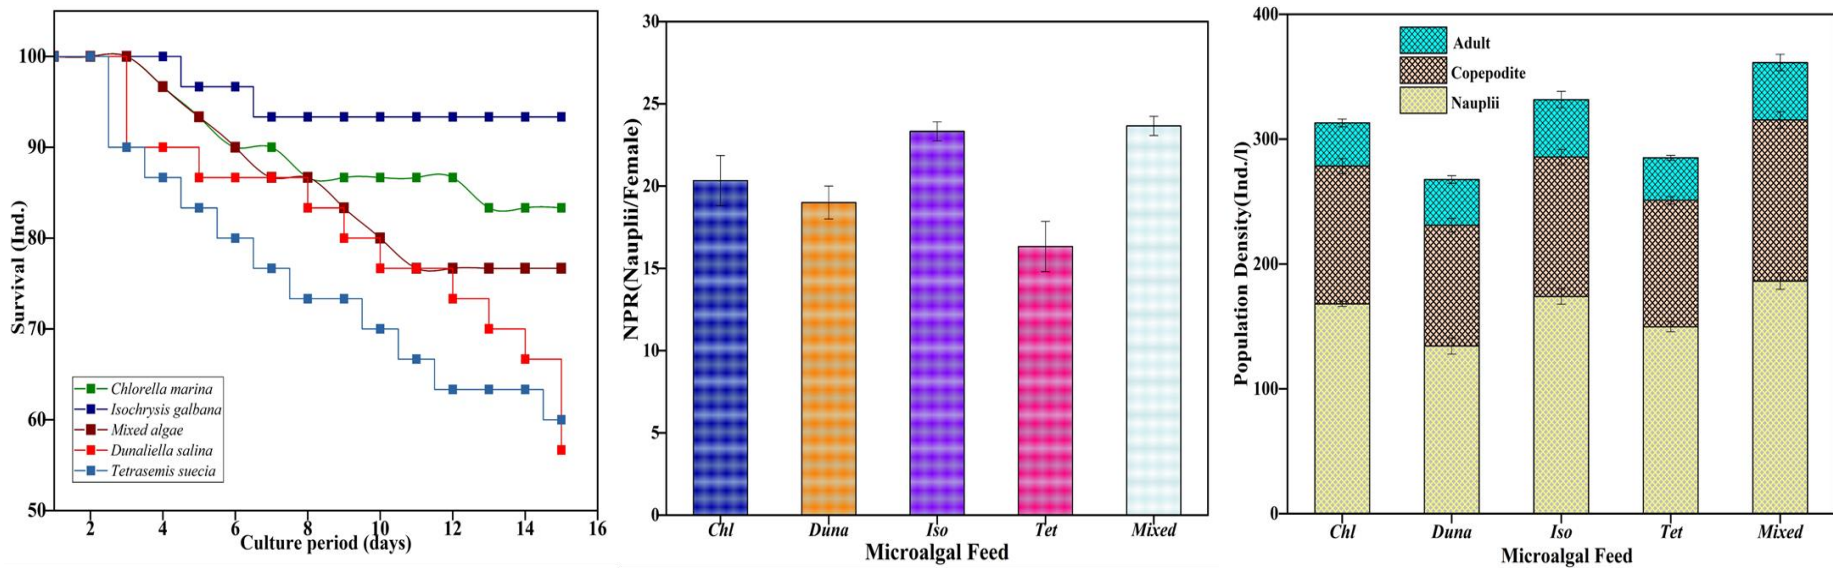

**Fig.10** Effect of different microalgae feed on Survival rate (SR), Nauplii production rate (NPR) and Population density (PD) of *O. dissimilis*

**Table 1:** Dataset preparation of cytochrome c oxidase I of *O. dissimilis* PS-11 and its phylogenetic similarity using NCBI-BLAST

| Accession  | Organism                  | Haplotype  | Query cover (%) | E-value   | Identity (%) |
|------------|---------------------------|------------|-----------------|-----------|--------------|
| AB604163.1 | <i>Oithona dissimilis</i> | OdS-CO1-03 | 98              | 3.00E-144 | 81           |
| AB604164.1 | <i>Oithona dissimilis</i> | OdS-CO1-04 | 98              | 9.00E-144 | 81           |
| AB604161.1 | <i>Oithona dissimilis</i> | OdS-CO1-01 | 98              | 4.00E-142 | 81           |
| AB604162.1 | <i>Oithona dissimilis</i> | OdS-CO1-02 | 98              | 5.00E-141 | 81           |
| AB604165.1 | <i>Oithona dissimilis</i> | OdJ-CO1-01 | 98              | 4.00E-117 | 79           |

**Table-2:** Estimation of inter-specific pair-wise genetic distance of COI gene of *O. dissimilis* PS-11 from its phylogenetic neighbours obtained from MEGA 7.0.

| S. No. | Accession  | Organism                  | Haplotype  | 1     | 2     | 3     | 4     | 5     |
|--------|------------|---------------------------|------------|-------|-------|-------|-------|-------|
| 1.     | MG763913   | <i>Oithona dissimilis</i> | -          |       |       |       |       |       |
| 2.     | AB604163.1 | <i>Oithona dissimilis</i> | OdS-CO1-03 | 0.854 |       |       |       |       |
| 3.     | AB604164.1 | <i>Oithona dissimilis</i> | OdS-CO1-04 | 0.867 | 0.006 |       |       |       |
| 4.     | AB604161.1 | <i>Oithona dissimilis</i> | OdS-CO1-01 | 0.867 | 0.007 | 0.002 |       |       |
| 5.     | AB604162.1 | <i>Oithona dissimilis</i> | OdS-CO1-02 | 0.87  | 0.008 | 0.006 | 0.007 |       |
| 6.     | AB604165.1 | <i>Oithona dissimilis</i> | OdJ-CO1-01 | 1.031 | 1.137 | 1.131 | 1.131 | 1.116 |

Table-3: Estimation of inter-specific pair-wise genetic distance of COI gene of *O. dissimilis* PS-11 from its phylogenetic neighbours' obtained from MEGA 7.0

| S. No. | Organism                          | 1     | 2     | 3     | 4     | 5     | 6     | 7     | 8     | 9     | 10    | 11    | 12    | 13    | 14    | 15    | 16    | 17 |
|--------|-----------------------------------|-------|-------|-------|-------|-------|-------|-------|-------|-------|-------|-------|-------|-------|-------|-------|-------|----|
| 1      | <i>Oithona dissimilis</i>         |       |       |       |       |       |       |       |       |       |       |       |       |       |       |       |       |    |
| 2      | <i>Oithona dissimilis</i>         | 0.032 |       |       |       |       |       |       |       |       |       |       |       |       |       |       |       |    |
| 3      | <i>Oithona dissimilis</i>         | 0.037 | 0.005 |       |       |       |       |       |       |       |       |       |       |       |       |       |       |    |
| 4      | <i>Oithona dissimilis</i>         | 0.046 | 0.051 | 0.056 |       |       |       |       |       |       |       |       |       |       |       |       |       |    |
| 5      | <i>Oithona dissimilis</i>         | 0.065 | 0.065 | 0.07  | 0.023 |       |       |       |       |       |       |       |       |       |       |       |       |    |
| 6      | <i>Parvocalanus crassirostris</i> | 0.251 | 0.268 | 0.262 | 0.262 | 0.274 |       |       |       |       |       |       |       |       |       |       |       |    |
| 7      | <i>Paracalanus acueatus</i>       | 0.251 | 0.268 | 0.262 | 0.262 | 0.274 | 0.009 |       |       |       |       |       |       |       |       |       |       |    |
| 8      | <i>Labidocera sp.</i>             | 0.268 | 0.28  | 0.274 | 0.268 | 0.28  | 0.061 | 0.051 |       |       |       |       |       |       |       |       |       |    |
| 9      | <i>Calanopia Thompson</i>         | 0.274 | 0.286 | 0.28  | 0.274 | 0.274 | 0.065 | 0.056 | 0.005 |       |       |       |       |       |       |       |       |    |
| 10     | <i>Oithona simplex</i>            | 0.274 | 0.28  | 0.28  | 0.268 | 0.251 | 0.125 | 0.125 | 0.125 | 0.125 |       |       |       |       |       |       |       |    |
| 11     | <i>Centropages tenuiremis</i>     | 0.262 | 0.274 | 0.268 | 0.262 | 0.274 | 0.065 | 0.056 | 0.023 | 0.028 | 0.135 |       |       |       |       |       |       |    |
| 12     | <i>Clausocalanus lividus</i>      | 0.251 | 0.268 | 0.262 | 0.268 | 0.28  | 0.046 | 0.037 | 0.061 | 0.065 | 0.146 | 0.061 |       |       |       |       |       |    |
| 13     | <i>Bestiolina similis</i>         | 0.251 | 0.274 | 0.268 | 0.268 | 0.28  | 0.028 | 0.018 | 0.056 | 0.061 | 0.125 | 0.061 | 0.042 |       |       |       |       |    |
| 14     | <i>Labidocera sp.</i>             | 0.268 | 0.28  | 0.274 | 0.268 | 0.28  | 0.061 | 0.051 | 0.0   | 0.005 | 0.125 | 0.023 | 0.061 | 0.056 |       |       |       |    |
| 15     | <i>Bestiolina similis</i>         | 0.251 | 0.274 | 0.268 | 0.268 | 0.28  | 0.28  | 0.018 | 0.056 | 0.061 | 0.125 | 0.061 | 0.042 | 0.0   | 0.056 |       |       |    |
| 16     | <i>Clausocalanus lividus</i>      | 0.251 | 0.268 | 0.262 | 0.268 | 0.28  | 0.046 | 0.037 | 0.061 | 0.065 | 0.146 | 0.061 | 0.0   | 0.042 | 0.061 | 0.042 |       |    |
| 17     | <i>Centropage abdominalis</i>     | 0.268 | 0.268 | 0.262 | 0.268 | 0.28  | 0.065 | 0.056 | 0.018 | 0.023 | 0.125 | 0.042 | 0.046 | 0.065 | 0.018 | 0.065 | 0.046 |    |
